# Supplementary material for: Dual SARS-CoV-2 and MERS-CoV inhibitors from Artemisia monosperma : isolation, structure elucidation, molecular modelling studies, and in vitro activities
Source: Royal Society of Chemistry journal article supplement (doi:10.1039/d4ob00929k), 2024-01-01
Supplement: d4ob00929k1.pdf [file d4ob00929k1.pdf]

## Supplementary Information

### Dual SARS-CoV-2 and MERS-CoV Inhibitors from *Artemisia monosperma*: Isolation, Structure Elucidation, Molecular Modelling Studies, and *In vitro* Activities

Ahmed M. Badawy,<sup>a,†</sup> Marwa Samir M. Donia,<sup>b,†</sup> Nehal G. Hamdy,<sup>a,†</sup> Mayada M. El-Ayouty,<sup>a</sup>  
Osama G. Mohamed,<sup>c,d</sup> Khaled M. Darwish,<sup>e</sup> Ashootosh Tripathi,<sup>d,f</sup> and Safwat A. Ahmed,<sup>\*b</sup>

<sup>a</sup> *Department of Pharmacognosy, Faculty of Pharmacy, Sinai University, El-Arish 45511, Egypt; [ahmed.badawy@su.edu.eg](mailto:ahmed.badawy@su.edu.eg) (A.M.B.); [nehal.aly@su.edu.eg](mailto:nehal.aly@su.edu.eg) (N.G.H.); [miada.mohamed@su.edu.eg](mailto:miada.mohamed@su.edu.eg) (M.M.E.)*

<sup>b</sup> *Department of Pharmacognosy, Faculty of Pharmacy, Suez Canal University, Ismailia 41522, Egypt; [mtonia00@gmail.com](mailto:mtonia00@gmail.com) (M.S.M.D.).*

<sup>c</sup> *Pharmacognosy Department, Faculty of Pharmacy, Cairo University, Kasr el Aini St., Cairo 11562, Egypt; [osama.mohamed@pharma.cu.edu.eg](mailto:osama.mohamed@pharma.cu.edu.eg) (O.G.M.)*

<sup>d</sup> *Natural Products Discovery Core, Life Sciences Institute, University of Michigan, Ann Arbor, MI 48109, USA,*

<sup>e</sup> *Department of Medicinal Chemistry, Faculty of Pharmacy, Suez Canal University, Ismailia 41522, Egypt; [Khaled\\_darwish@pharm.suez.edu.eg](mailto:Khaled_darwish@pharm.suez.edu.eg) (K.M.D.)*

<sup>f</sup> *Department of Medicinal Chemistry, College of Pharmacy, University of Michigan, Ann Arbor, MI 48109, USA; [ashtri@umich.edu](mailto:ashtri@umich.edu) (A.T.)*

*Correspondence: [safwat\\_aa@yahoo.com](mailto:safwat_aa@yahoo.com) or [safwat\\_ahmed@pharm.suez.edu.eg](mailto:safwat_ahmed@pharm.suez.edu.eg) (S.A.A.); Tel.: +20-010-92638387; Fax: +20-064-32307*

## List of figures: -

|                                                                                                                      |    |
|----------------------------------------------------------------------------------------------------------------------|----|
| Figure S. 1: $^1\text{H}$ -NMR spectrum of compound 1 (300 MHz, $\text{DMSO-}d_6$ ) .....                            | 8  |
| Figure S. 2: Partial expansion of $^1\text{H}$ -NMR spectrum of compound 1 (300 MHz, $\text{DMSO-}d_6$ ) .....       | 8  |
| Figure S. 3: $^{13}\text{C}$ -NMR spectrum of compound 1 (300 MHz, $\text{DMSO-}d_6$ ) .....                         | 9  |
| Figure S. 4: $^1\text{H}$ -NMR spectrum of compound 1 (300 MHz, $\text{DMSO-}d_6$ ) .....                            | 9  |
| Figure S. 5: LC-MS/MS of compound 1 .....                                                                            | 10 |
| Figure S. 6: $^1\text{H}$ -NMR spectrum of compound 2 (300 MHz, $\text{DMSO-}d_6$ ) .....                            | 10 |
| Figure S. 7: $^{13}\text{C}$ -NMR spectrum of compound 2 (300 MHz, $\text{DMSO-}d_6$ ) .....                         | 11 |
| Figure S. 8: $^1\text{H}$ -NMR spectrum of compound 2 (300 MHz, $\text{DMSO-}d_6$ ) .....                            | 11 |
| Figure S. 9: LC-MS/MS of compound 2 .....                                                                            | 12 |
| Figure S. 10: $^1\text{H}$ -NMR spectrum of compound 3 (400 MHz, $\text{DMSO-}d_6$ ) .....                           | 12 |
| Figure S. 11: Partial expansion of $^1\text{H}$ -NMR spectrum of compound 3 (400 MHz, $\text{DMSO-}d_6$ ) .....      | 13 |
| Figure S. 12: Partial expansion of $^1\text{H}$ -NMR spectrum of compound 3 (400 MHz, $\text{DMSO-}d_6$ ) .....      | 13 |
| Figure S. 13: Partial expansion of $^1\text{H}$ -NMR spectrum of compound 3 (400 MHz, $\text{DMSO-}d_6$ ) .....      | 14 |
| Figure S. 14: $^{13}\text{C}$ -NMR spectrum of 3 (400 MHz, $\text{DMSO-}d_6$ ) .....                                 | 14 |
| Figure S. 15: $^1\text{H}$ -NMR spectrum of compound 3 (400 MHz, $\text{DMSO-}d_6$ ) .....                           | 15 |
| Figure S. 16: LC-MS/MS of compound 3 .....                                                                           | 15 |
| Figure S. 17: $^1\text{H}$ -NMR spectrum of compound 4 (600 MHz, $\text{CD}_3\text{OD}$ ) .....                      | 16 |
| Figure S. 18: Partial expansion of $^1\text{H}$ -NMR spectrum of compound 4 (600 MHz, $\text{CD}_3\text{OD}$ ) ..... | 16 |
| Figure S. 19: Partial expansion of $^1\text{H}$ -NMR spectrum of compound 4 (600 MHz, $\text{CD}_3\text{OD}$ ) ..... | 17 |
| Figure S. 20: Partial expansion of $^1\text{H}$ -NMR spectrum of compound 4 (600 MHz, $\text{CD}_3\text{OD}$ ) ..... | 17 |
| Figure S. 21: $^{13}\text{C}$ -NMR spectrum of compound 4 (600 MHz, $\text{CD}_3\text{OD}$ ) .....                   | 18 |
| Figure S. 22: $^1\text{H}$ -NMR spectrum of compound 4 (600 MHz, $\text{CD}_3\text{OD}$ ) .....                      | 18 |
| Figure S. 23: LC-MS/MS of compound 4 .....                                                                           | 19 |
| Figure S. 24: $^1\text{H}$ -NMR spectrum of compound 5 (600 MHz, $\text{CD}_3\text{OD}$ ) .....                      | 19 |
| Figure S. 25: Partial expansion of $^1\text{H}$ -NMR spectrum of compound 5 (600 MHz, $\text{CD}_3\text{OD}$ ) ..... | 20 |
| Figure S. 26: Partial expansion of $^1\text{H}$ -NMR spectrum of compound 5 (600 MHz, $\text{CD}_3\text{OD}$ ) ..... | 20 |
| Figure S. 27: $^{13}\text{C}$ -NMR spectrum of compound 5 (150 MHz, $\text{CD}_3\text{OD}$ ) .....                   | 21 |
| Figure S. 28: $^1\text{H}$ -NMR spectrum of compound 5 (600 MHz, $\text{CD}_3\text{OD}$ ) .....                      | 21 |
| Figure S. 29: LC-MS/MS of compound 5 .....                                                                           | 22 |
| Figure S. 30: $^1\text{H}$ -NMR spectrum of compound 6 (600 MHz, $\text{CD}_3\text{OD}$ ) .....                      | 22 |
| Figure S. 31: Partial expansion of $^1\text{H}$ -NMR spectrum of compound 6 (600 MHz, $\text{CD}_3\text{OD}$ ) ..... | 23 |
| Figure S. 32: Partial expansion of $^1\text{H}$ -NMR spectrum of compound 6 (600 MHz, $\text{CD}_3\text{OD}$ ) ..... | 23 |
| Figure S. 33: Partial expansion of $^1\text{H}$ -NMR spectrum of compound 6 (600 MHz, $\text{CD}_3\text{OD}$ ) ..... | 24 |
| Figure S. 34: $^{13}\text{C}$ -NMR spectrum of compound 6 (150 MHz, $\text{CD}_3\text{OD}$ ) .....                   | 24 |
| Figure S. 35: $^1\text{H}$ -NMR spectrum of compound 6 (600 MHz, $\text{CD}_3\text{OD}$ ) .....                      | 25 |
| Figure S. 36: LC-MS/MS of compound 6 .....                                                                           | 25 |
| Figure S. 37: $^1\text{H}$ -NMR spectrum of compound 7 (300 MHz, $\text{DMSO-}d_6$ ) .....                           | 26 |
| Figure S. 38: Partial expansion of $^1\text{H}$ -NMR spectrum of compound 7 (300 MHz, $\text{DMSO-}d_6$ ) .....      | 26 |
| Figure S. 39: Partial expansion of $^1\text{H}$ -NMR spectrum of compound 7 (300 MHz, $\text{DMSO-}d_6$ ) .....      | 27 |
| Figure S. 40: Partial expansion of $^1\text{H}$ -NMR spectrum of compound 7 (300 MHz, $\text{DMSO-}d_6$ ) .....      | 27 |

|                                                                                                                |    |
|----------------------------------------------------------------------------------------------------------------|----|
| Figure S. 41: $^{13}\text{C}$ -NMR spectrum of compound 7 (75 MHz, $\text{DMSO-}d_6$ ).....                    | 28 |
| Figure S. 42: $^1\text{H}$ -NMR spectrum of compound 7 (300 MHz, $\text{DMSO-}d_6$ ).....                      | 28 |
| Figure S. 43: LC-MS/MS of compound 7 .....                                                                     | 29 |
| Figure S. 44: $^1\text{H}$ -NMR spectrum of compound 8 (300 MHz, $\text{DMSO-}d_6$ ).....                      | 29 |
| Figure S. 45: Partial expansion of $^1\text{H}$ -NMR spectrum of compound 8 (300 MHz, $\text{DMSO-}d_6$ )..... | 30 |
| Figure S. 46: Partial expansion of $^1\text{H}$ -NMR spectrum of compound 8 (300 MHz, $\text{DMSO-}d_6$ )..... | 30 |
| Figure S. 47: $^{13}\text{C}$ -NMR spectrum of compound 8 (300 MHz, $\text{DMSO-}d_6$ ).....                   | 31 |
| Figure S. 48: $^1\text{H}$ -NMR spectrum of compound 8 (300 MHz, $\text{DMSO-}d_6$ ).....                      | 31 |
| Figure S. 49: LC-MS/MS of compound 8 .....                                                                     | 32 |

## List of tables: -

|                                                                                                                                                                      |    |
|----------------------------------------------------------------------------------------------------------------------------------------------------------------------|----|
| Table S. 1: $^1\text{H}$ (300 MHz) and $^{13}\text{C}$ (75 MHz) NMR spectroscopic data of compound 1 (DMSO- <i>d</i> 6 $\delta$ in ppm, <i>J</i> in Hz).<br>.....    | 29 |
| Table S. 2 $^1\text{H}$ (300 MHz) and $^{13}\text{C}$ (75 MHz) NMR spectroscopic data of compound 2 (DMSO- <i>d</i> 6 $\delta$ in ppm, <i>J</i> in Hz).<br>.....     | 30 |
| Table S. 3 $^1\text{H}$ (400 MHz) and $^{13}\text{C}$ (100 MHz) NMR spectroscopic data of compound 3 (DMSO- <i>d</i> 6 $\delta$ in ppm, <i>J</i> in Hz).<br>.....    | 31 |
| Table S. 4 $^1\text{H}$ (600 MHz) and $^{13}\text{C}$ (150 MHz) NMR spectroscopic data of compound 4 (CD <sub>3</sub> OD, $\delta$ in ppm, <i>J</i> in Hz).<br>..... | 32 |
| Table S. 5 $^1\text{H}$ (600 MHz) and $^{13}\text{C}$ (150 MHz) NMR spectroscopic data of compound 5 (CD <sub>3</sub> OD, $\delta$ in ppm, <i>J</i> in Hz).<br>..... | 32 |
| Table S. 6 $^1\text{H}$ (600 MHz) and $^{13}\text{C}$ (150 MHz) NMR spectroscopic data of compound 6 (CD <sub>3</sub> OD, $\delta$ in ppm, <i>J</i> in Hz).<br>..... | 33 |
| Table S. 7. $^1\text{H}$ (300 MHz) and $^{13}\text{C}$ (75 MHz) NMR spectroscopic data of compound 7 (DMSO- <i>d</i> 6 $\delta$ in ppm, <i>J</i> in Hz).<br>.....    | 34 |
| Table S. 8 $^1\text{H}$ (300 MHz) and $^{13}\text{C}$ (75 MHz) NMR spectroscopic data of compound 8 (DMSO- <i>d</i> 6 $\delta$ in ppm, <i>J</i> in Hz).<br>.....     | 34 |



# Spectroscopic data of compound 1

## Figure S. 1:1H-NMR spectrum of compound 1 (300 MHz, DMSO-d6)

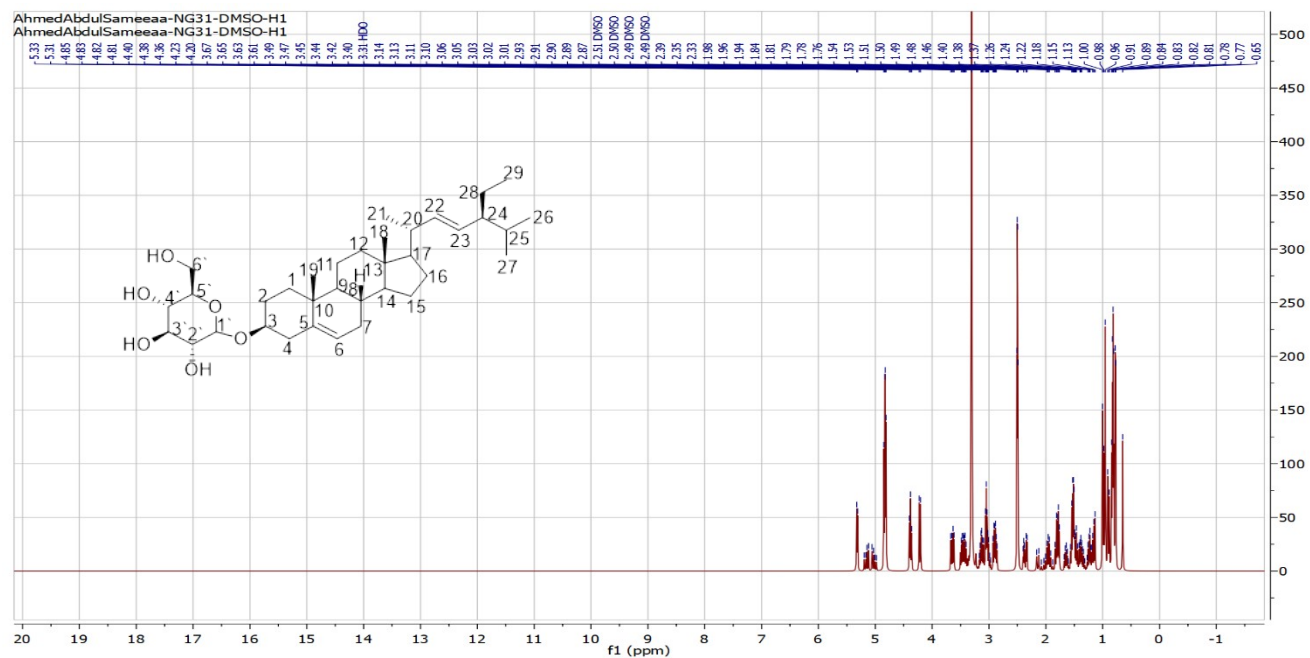

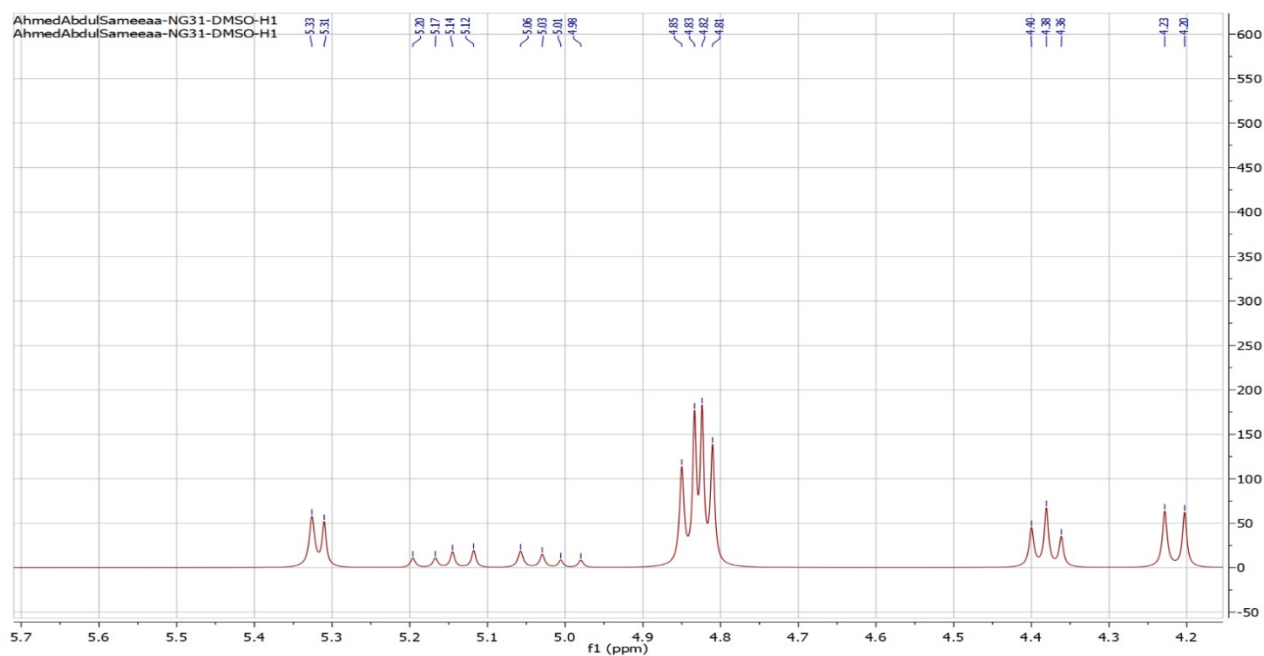

Figure S. 2: Partial expansion of  $^1\text{H}$ -NMR spectrum of compound 1 (300 MHz,  $\text{DMSO-}d_6$ ).

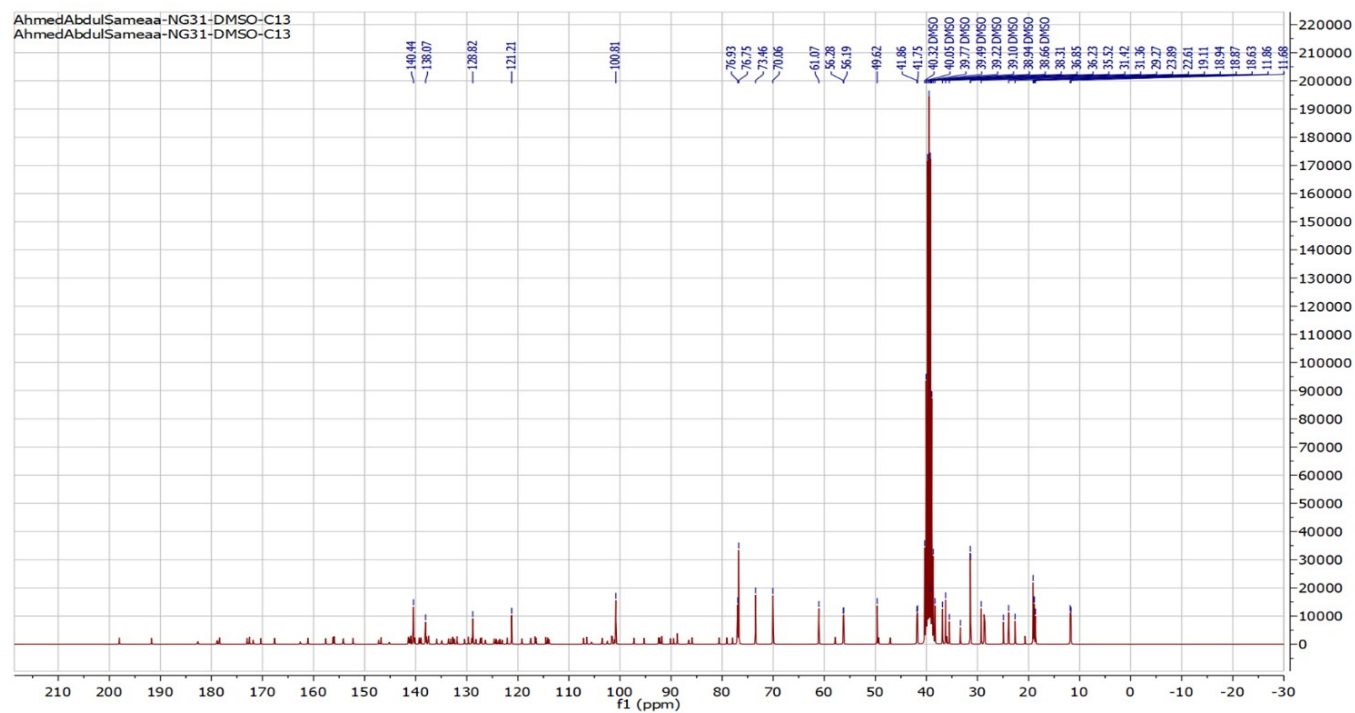

Figure S. 3:  $^{13}\text{C}$ -NMR spectrum of compound 1 (300 MHz,  $\text{DMSO-}d_6$ )

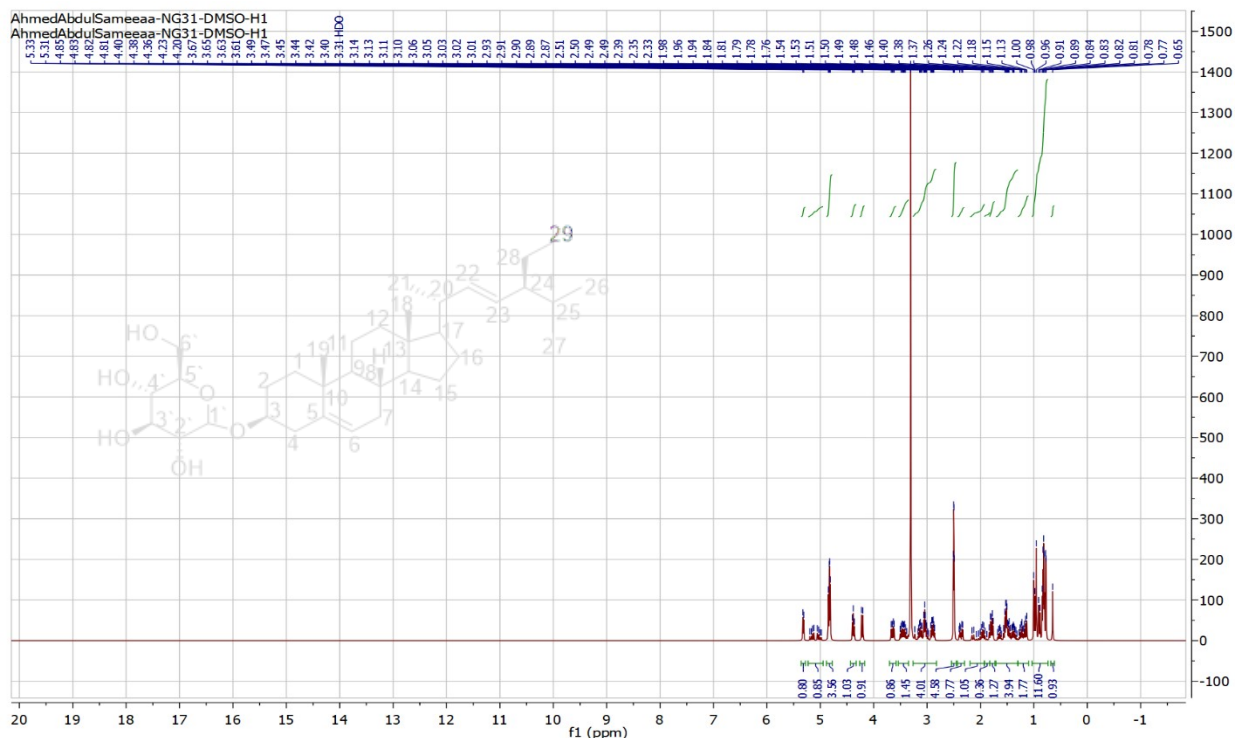

Figure S. 4:  $^1\text{H-NMR}$  spectrum of compound 1 (300 MHz,  $\text{DMSO-}d_6$ )

Spectrum from 201028-IDA-NEG-SM0084.wiff (sample ...periment 4, -TOF MS $^2$  (50 - 1000) from 25.622 min  
 Precursor: 573.4 Da

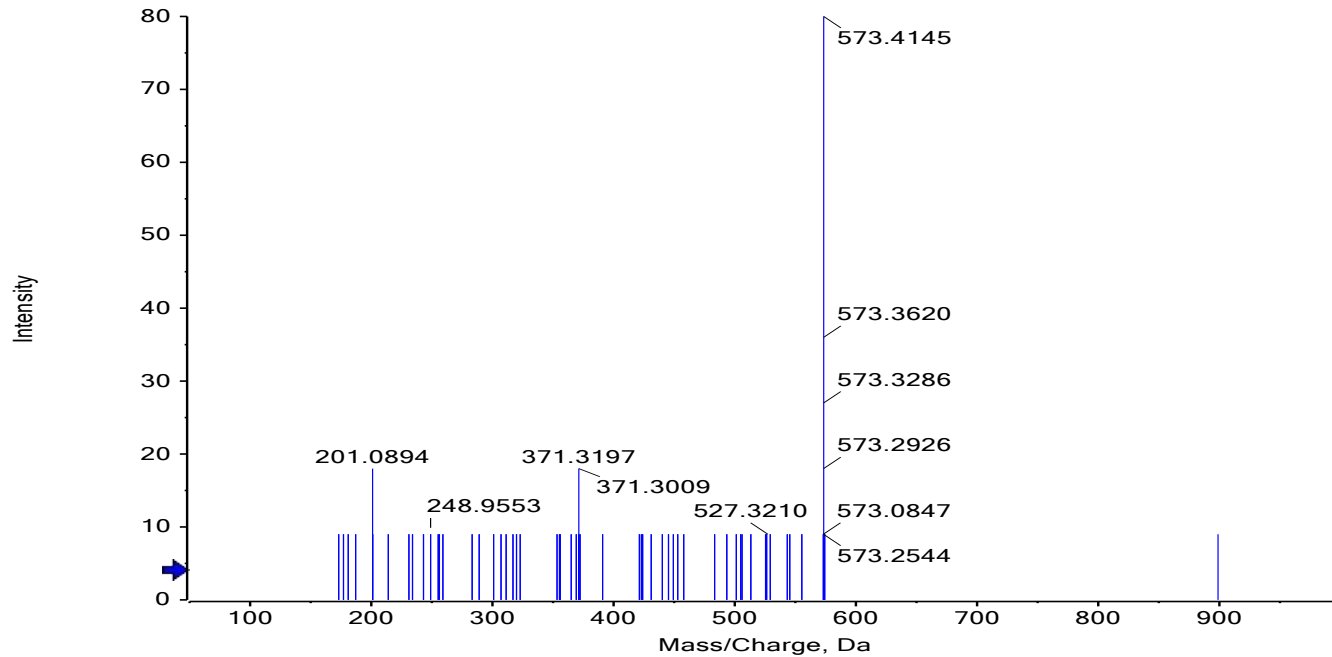

Figure S. 5: LC-MS/MS of compound 1



## Spectroscopic data of compound 2

Figure S. 6:  $^1\text{H-NMR}$  spectrum of compound 2 (300 MHz,  $\text{DMSO-}d_6$ )

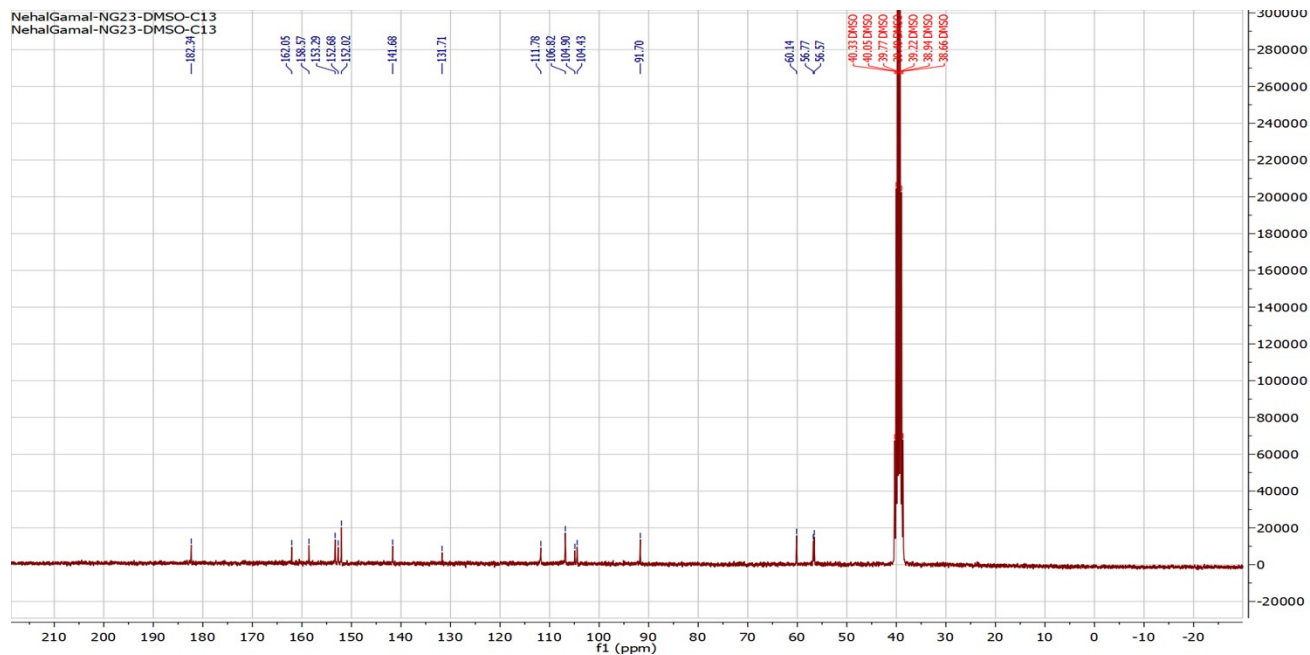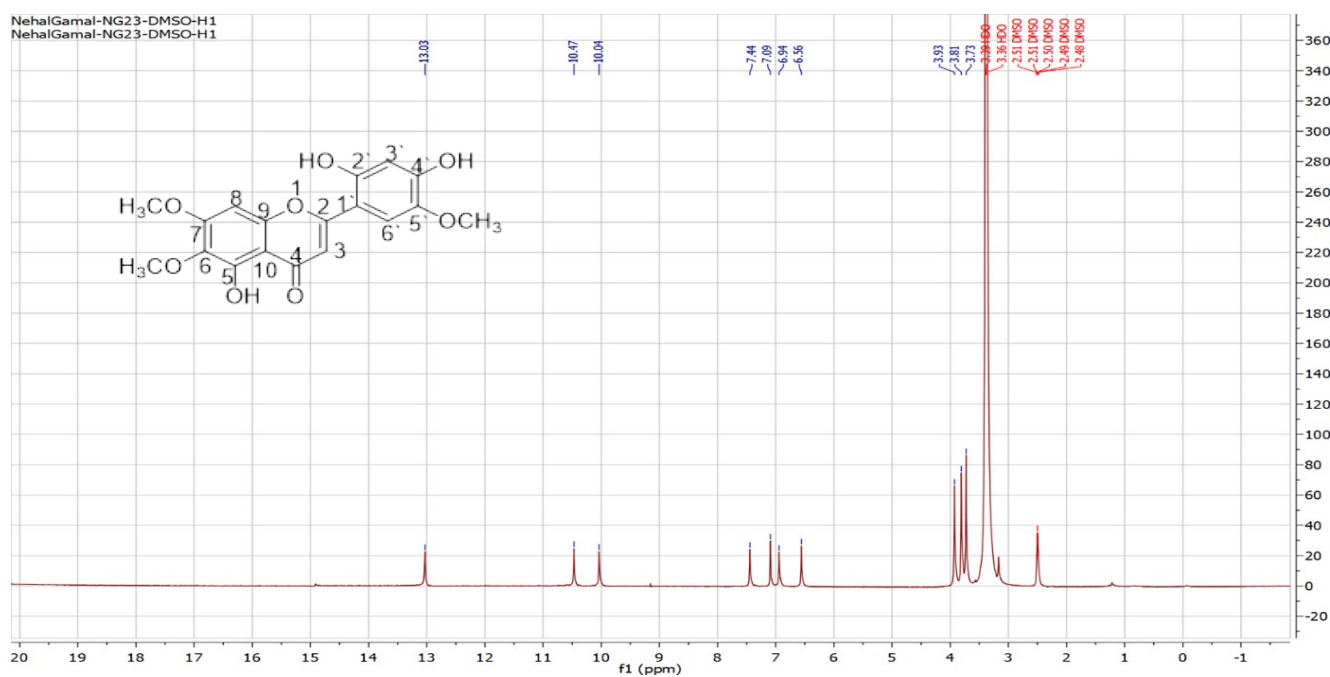

Figure S. 7:  $^{13}\text{C}$ -NMR spectrum of compound 2 (300 MHz,  $\text{DMSO-}d_6$ ).

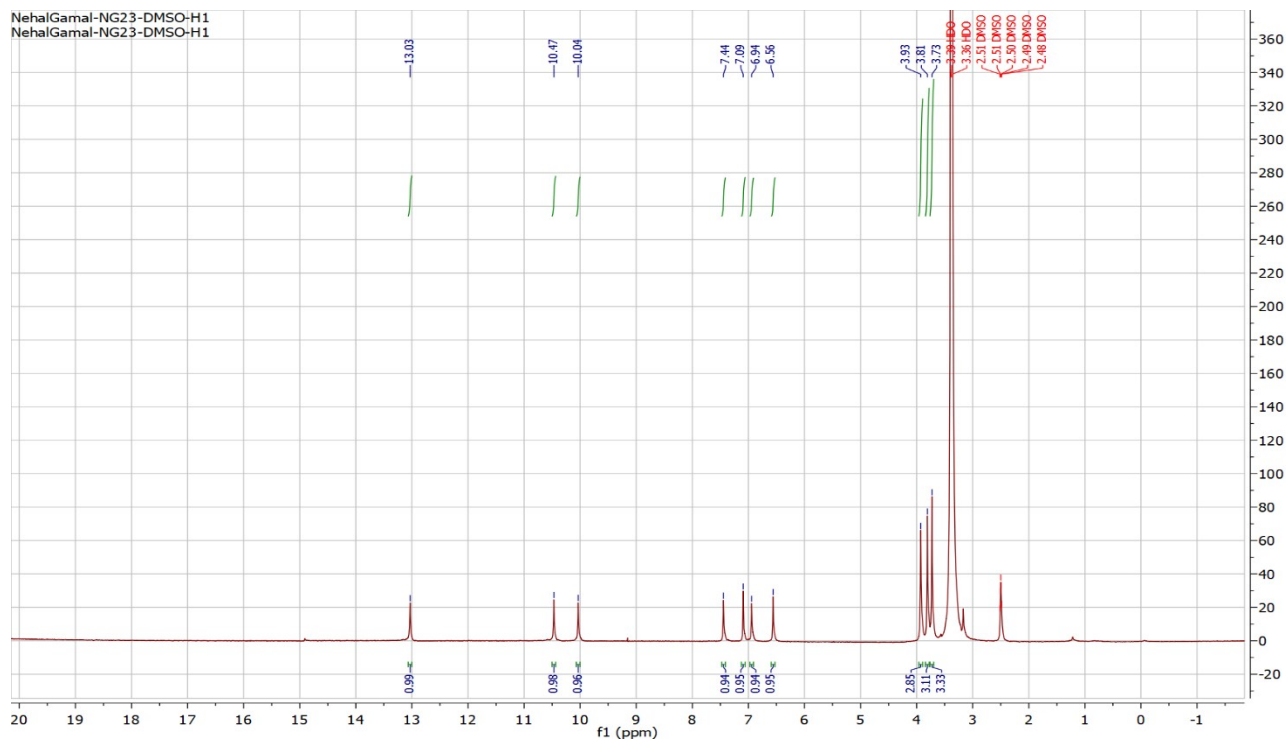

Figure S. 8:  $^1\text{H}$ -NMR spectrum of compound 2 (300 MHz,  $\text{DMSO-}d_6$ )

Spectrum from 201028-IDA-NEG-SM0084.wiff (sample ...periment 6, -TOF MS^2 (50 - 1000) from 10.682 min  
Precursor: 359.1 Da

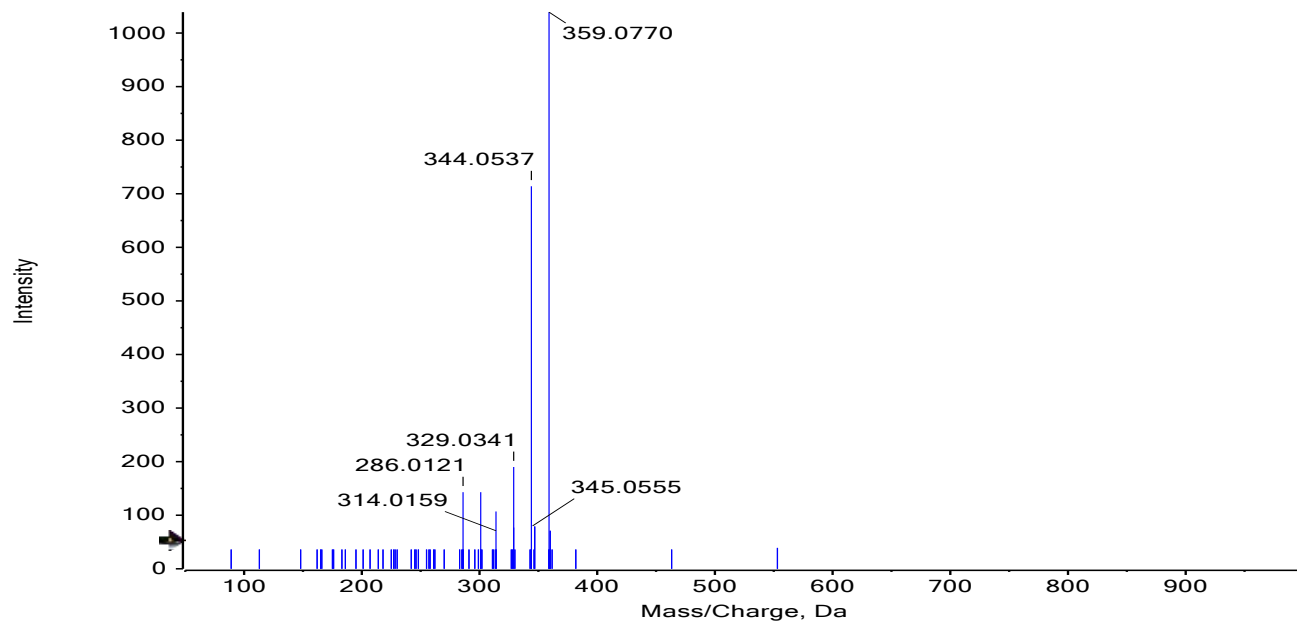

Figure S. 9: LC-MS/MS of compound 2

### Spectroscopic data of compound 3

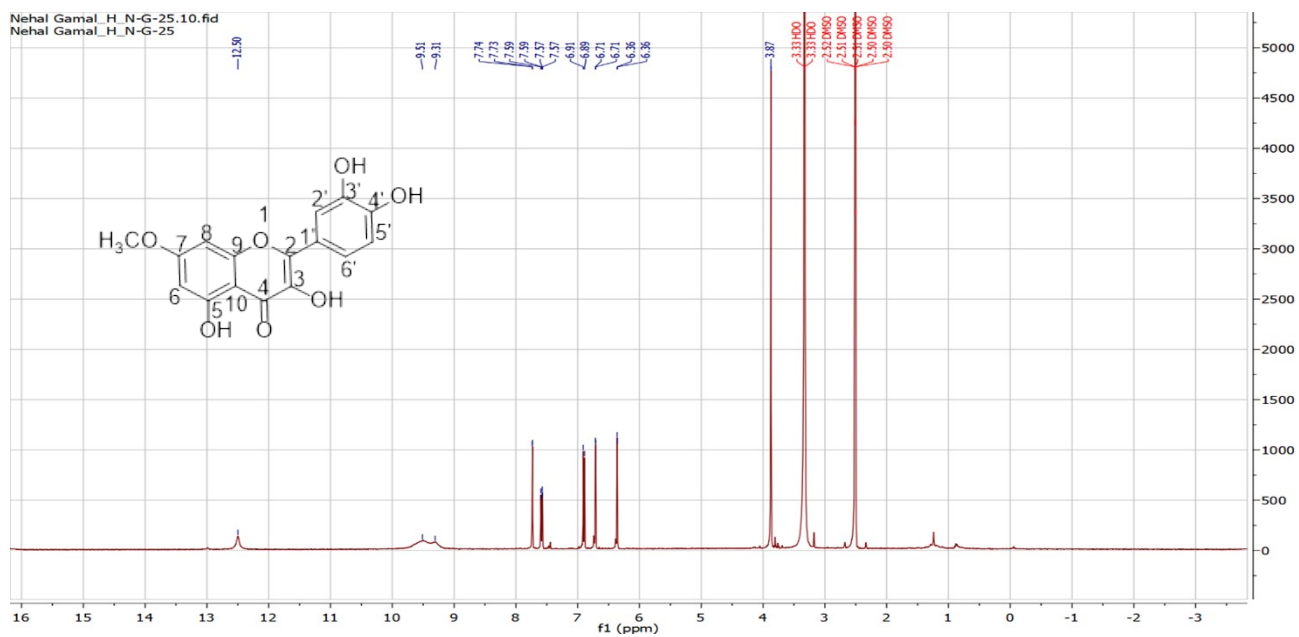

Figure S. 10: <sup>1</sup>H-NMR spectrum of compound 3 (400 MHz, DMSO-d<sub>6</sub>)

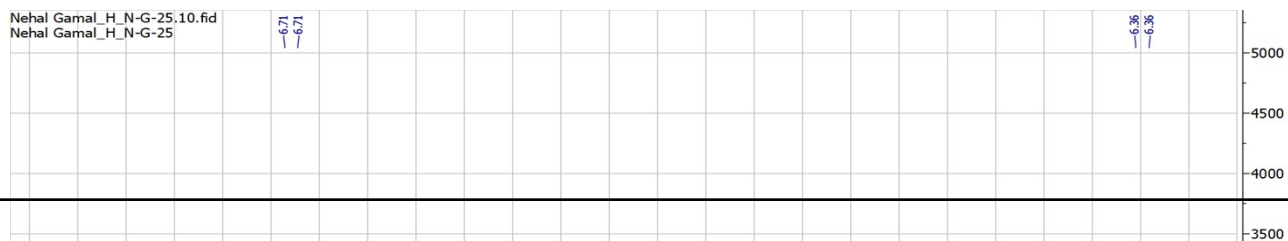

**Figure S. 11: Partial expansion of  $^1\text{H}$ -NMR spectrum of compound 3 (400 MHz,  $\text{DMSO-}d_6$ ).**

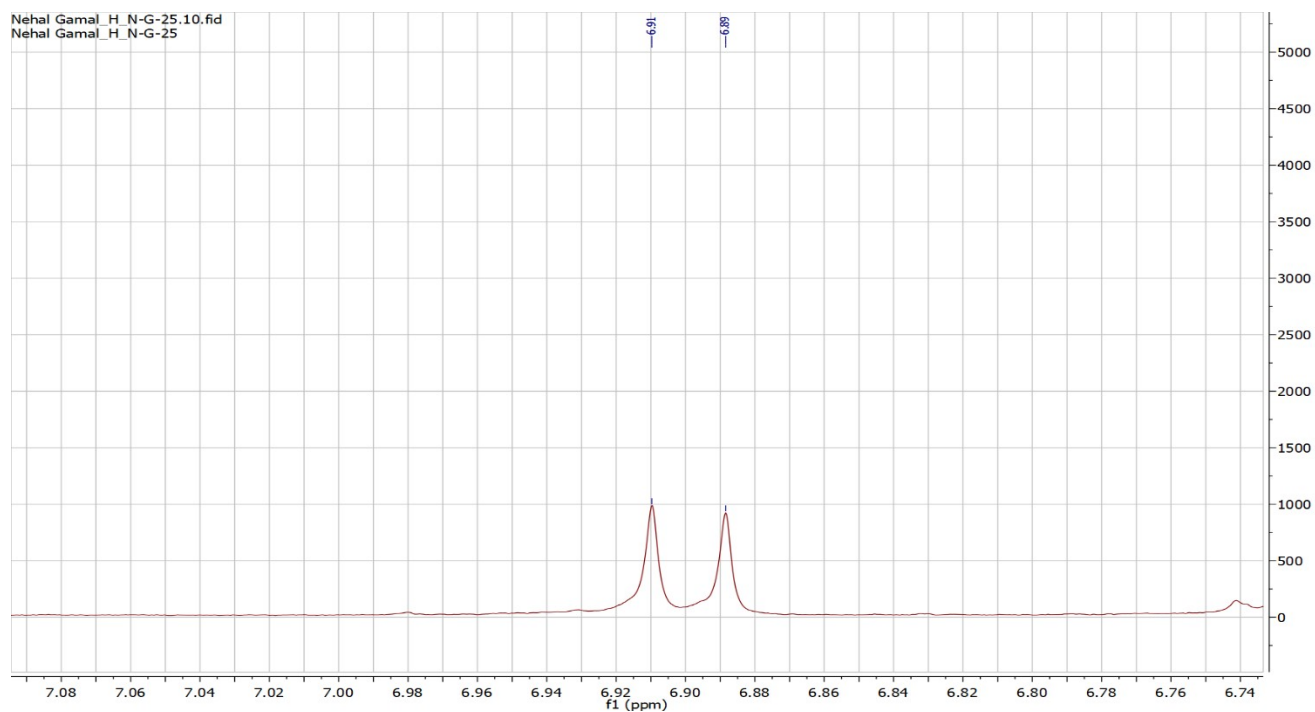

**Figure S. 12: Partial expansion of  $^1\text{H}$ -NMR spectrum of compound 3 (400 MHz,  $\text{DMSO-}d_6$ ).**

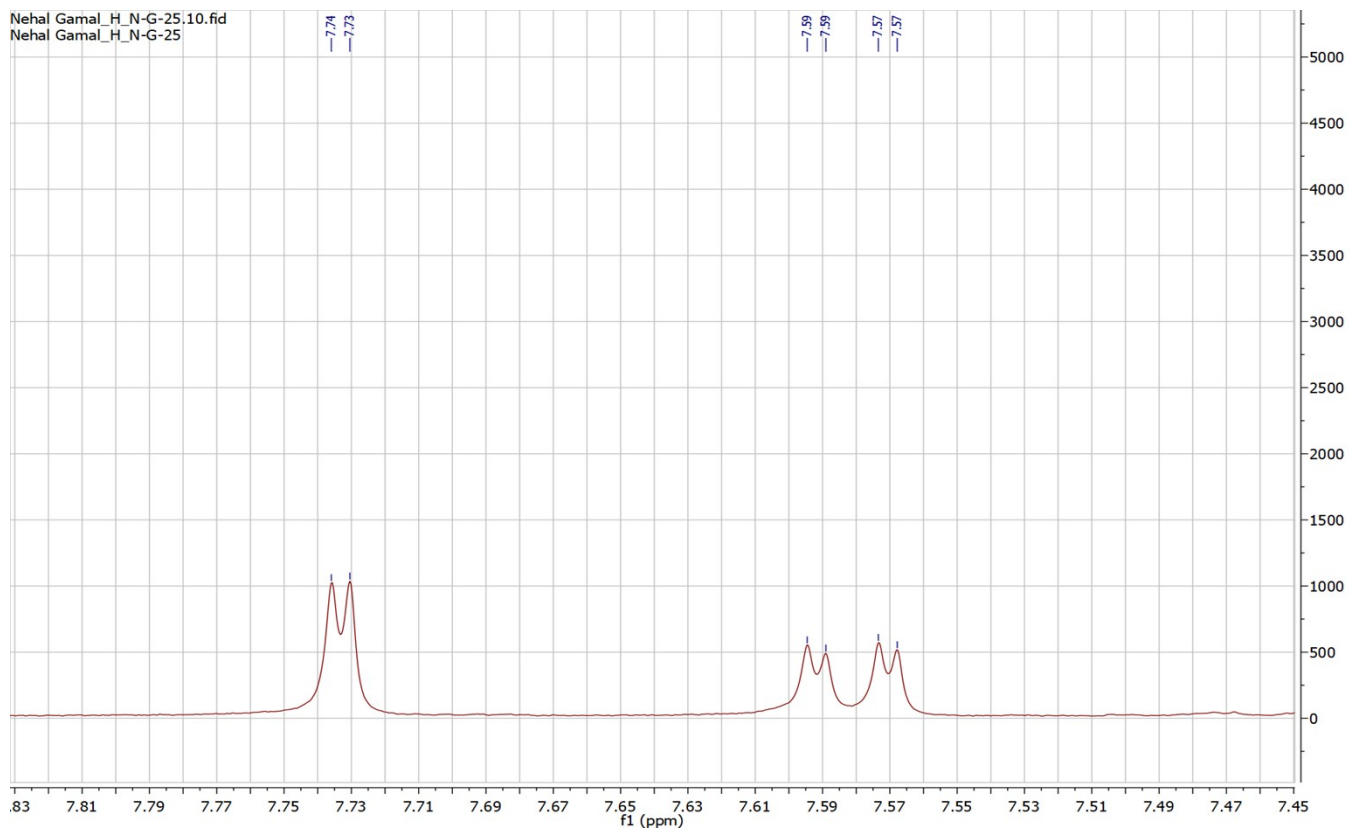

Figure S. 13: Partial expansion of  $^1\text{H}$ -NMR spectrum of compound 3 (400 MHz,  $\text{DMSO-d}_6$ ).

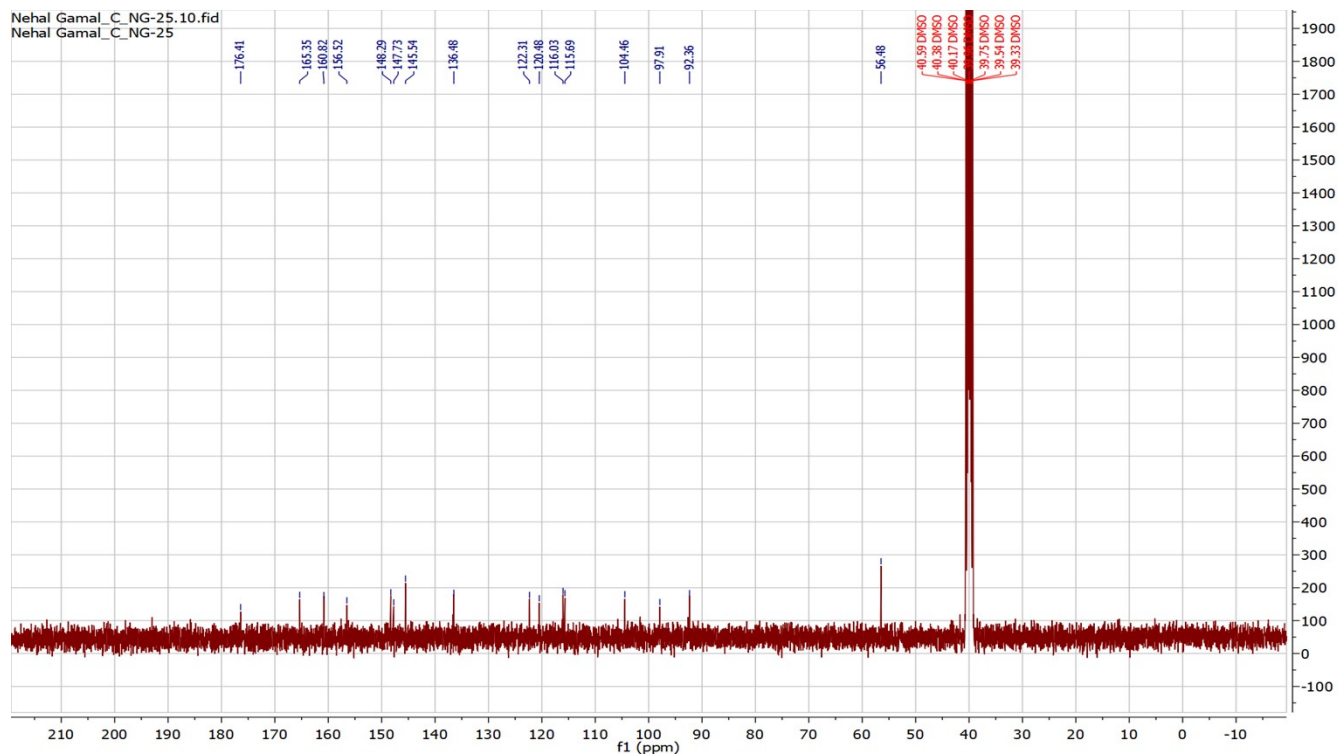

Figure S. 14:  $^{13}\text{C}$ -NMR spectrum of 3 (400 MHz,  $\text{DMSO-d}_6$ )

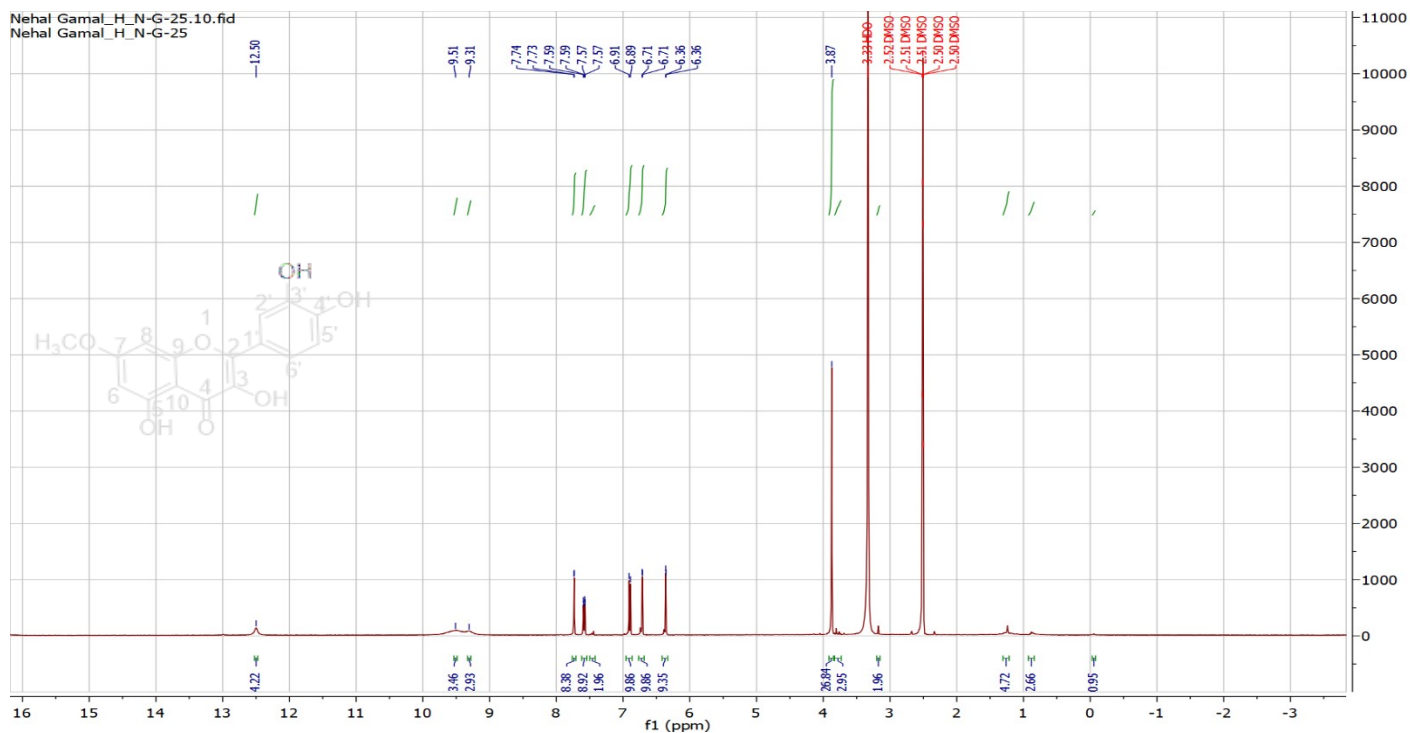

Figure S. 15: <sup>1</sup>H-NMR spectrum of compound 3 (400 MHz, DMSO-*d*<sub>6</sub>)

Spectrum from 201028-IDA-NEG-SM0084.wiff (sample 1) - 2...84, Experiment 3, -TOF MS<sup>2</sup> (50 - 1000) from 12.893 min  
Precursor: 315.0 Da

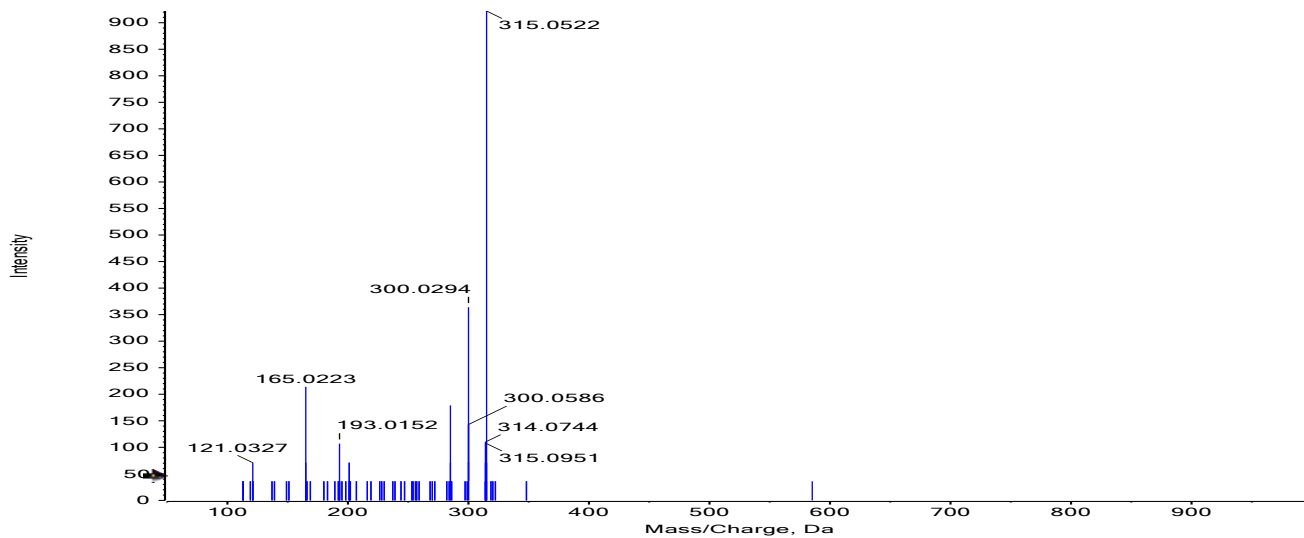

Figure S. 16: LC-MS/MS of compound 3

## Spectroscopic data of compound 4

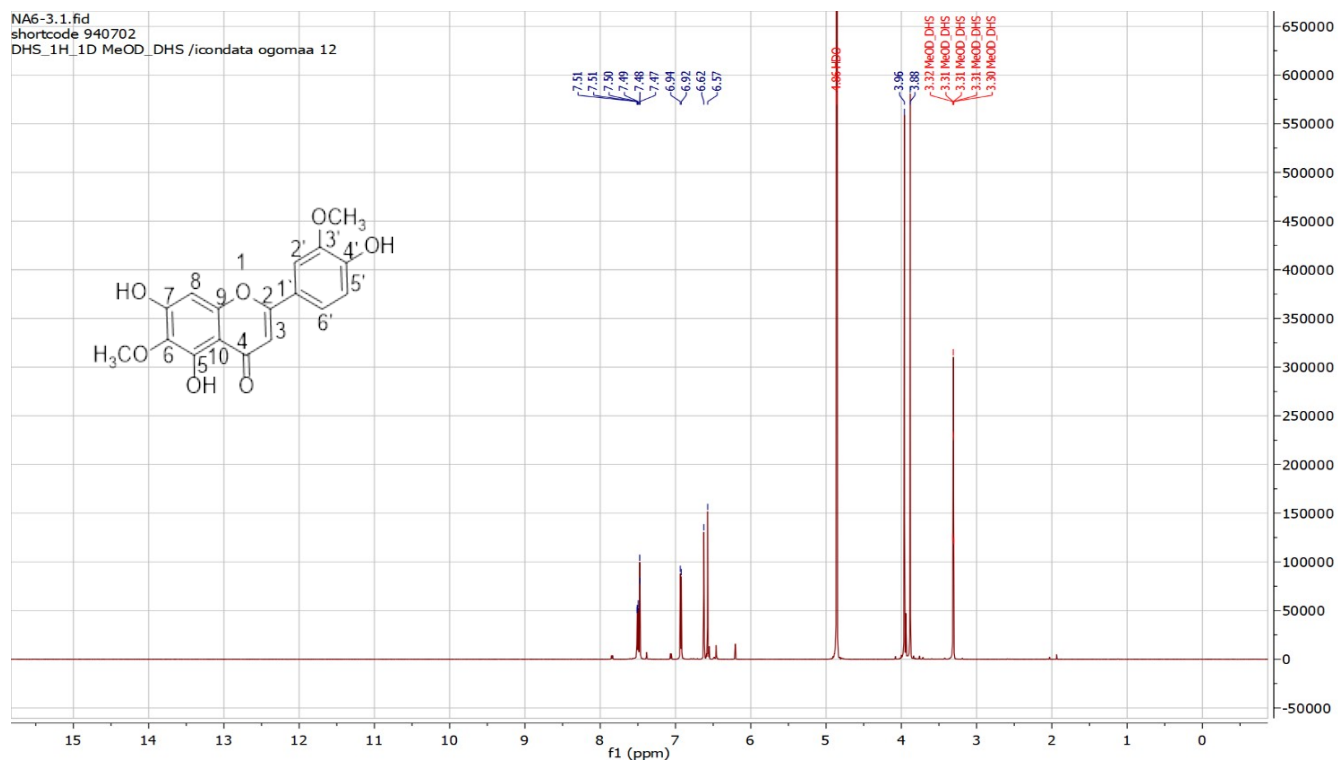

Figure S. 17:  $^1\text{H-NMR}$  spectrum of compound 4 (600 MHz,  $\text{CD}_3\text{OD}$ ).

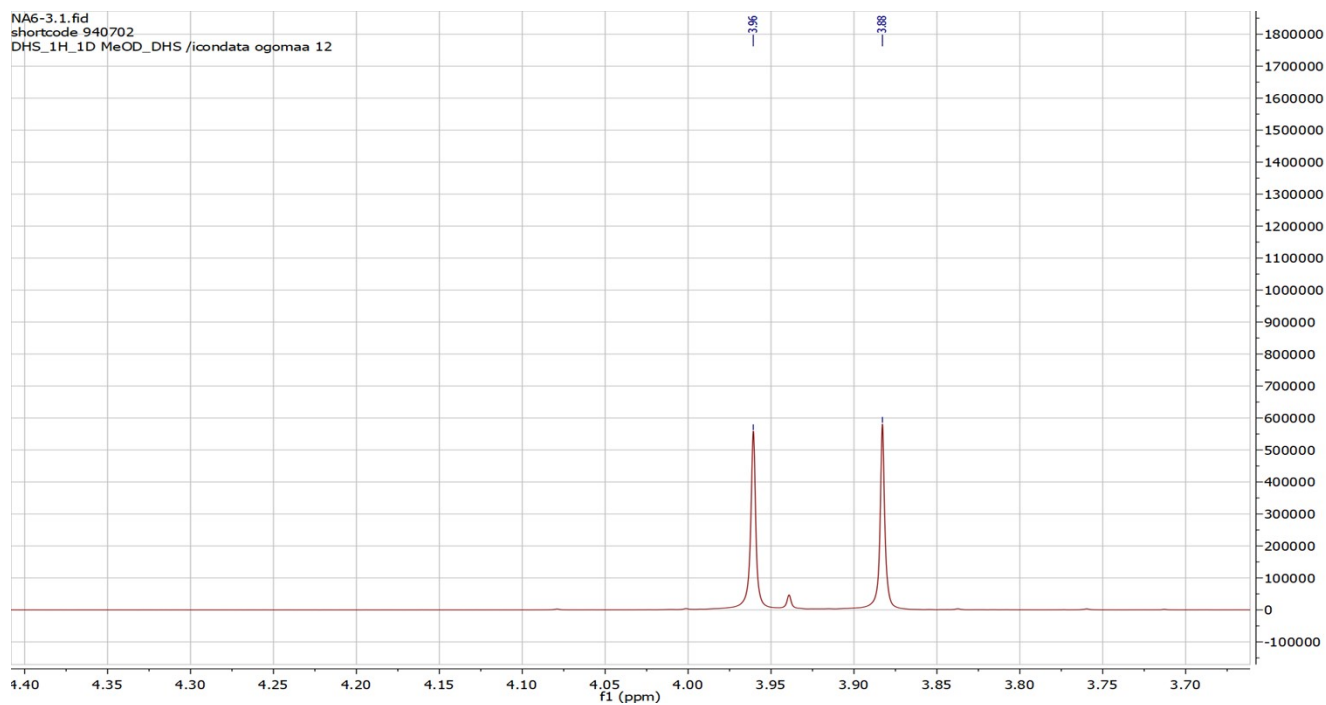

Figure S. 18: Partial expansion of  $^1\text{H-NMR}$  spectrum of compound 4 (600 MHz,  $\text{CD}_3\text{OD}$ ).

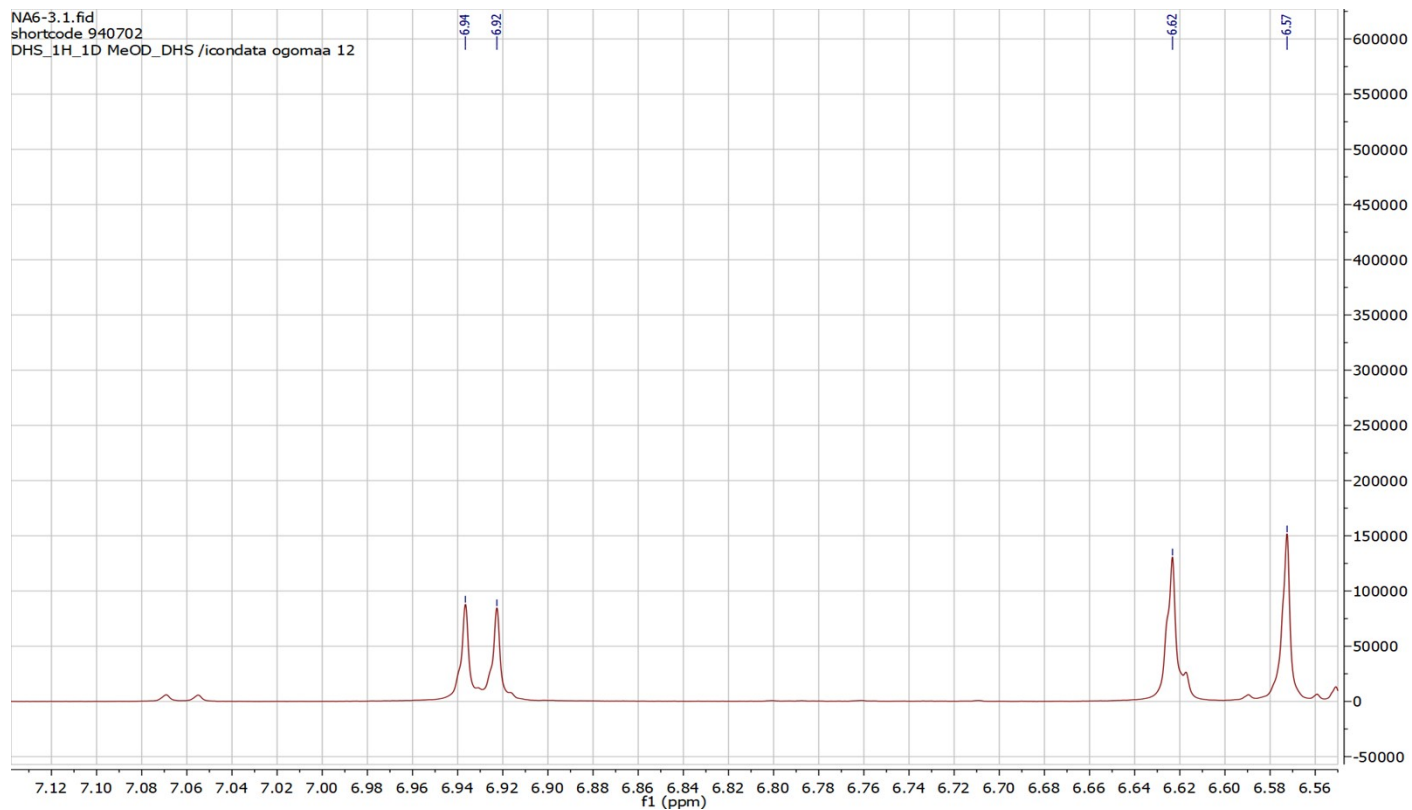

Figure S. 19: Partial expansion of  $^1\text{H}$ -NMR spectrum of compound 4 (600 MHz,  $\text{CD}_3\text{OD}$ ).

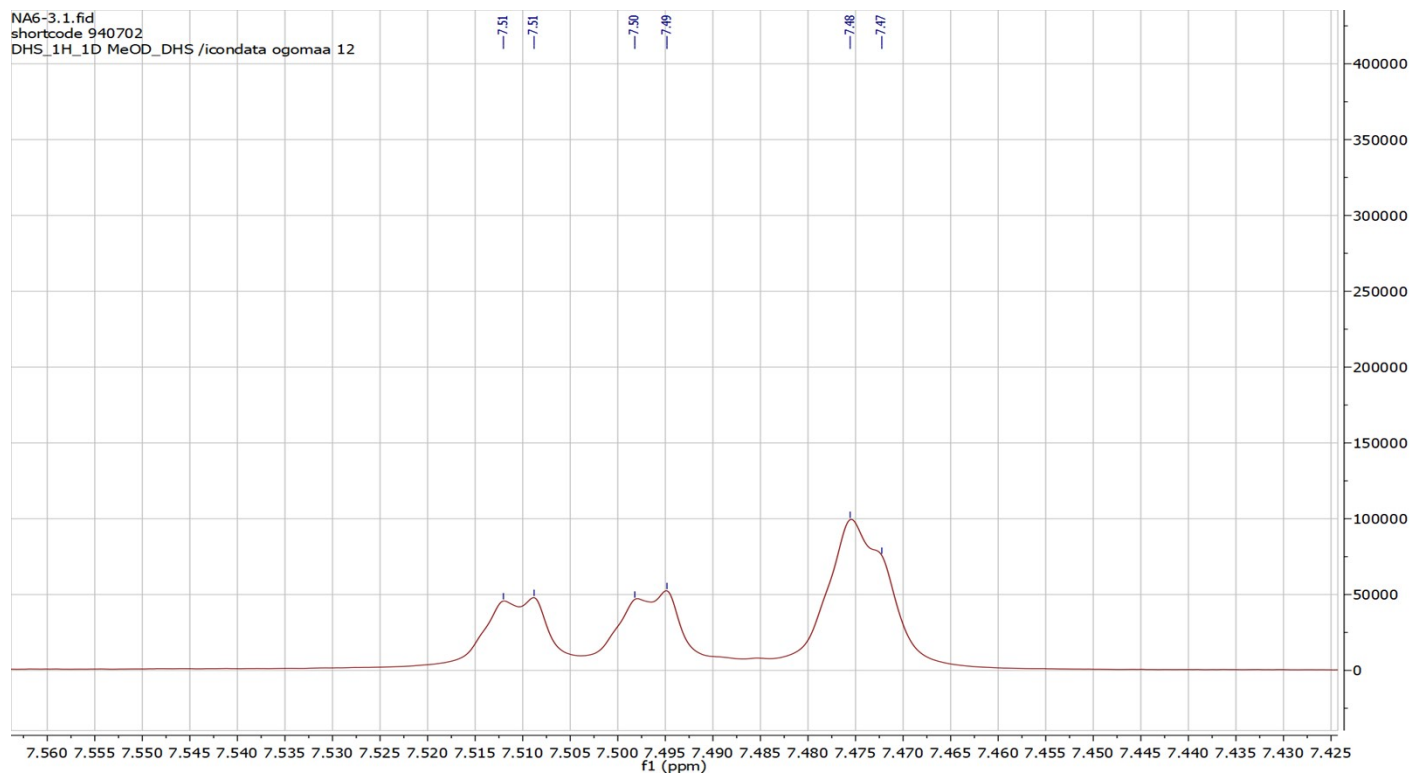

Figure S. 20: Partial expansion of  $^1\text{H}$ -NMR spectrum of compound 4 (600 MHz,  $\text{CD}_3\text{OD}$ ).



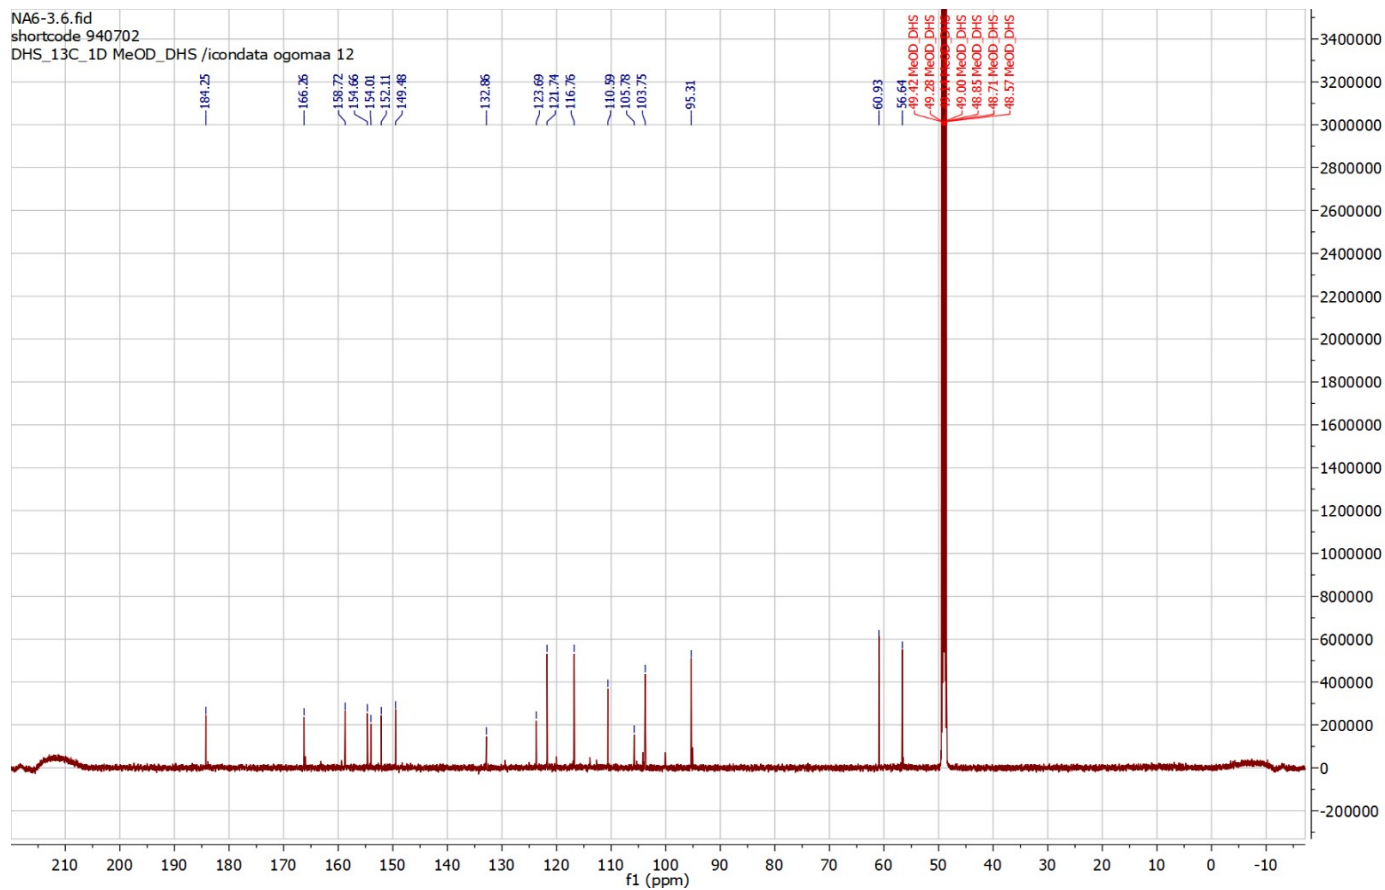

Figure S. 21:  $^{13}\text{C}$ -NMR spectrum of compound 4 (600 MHz,  $\text{CD}_3\text{OD}$ ).

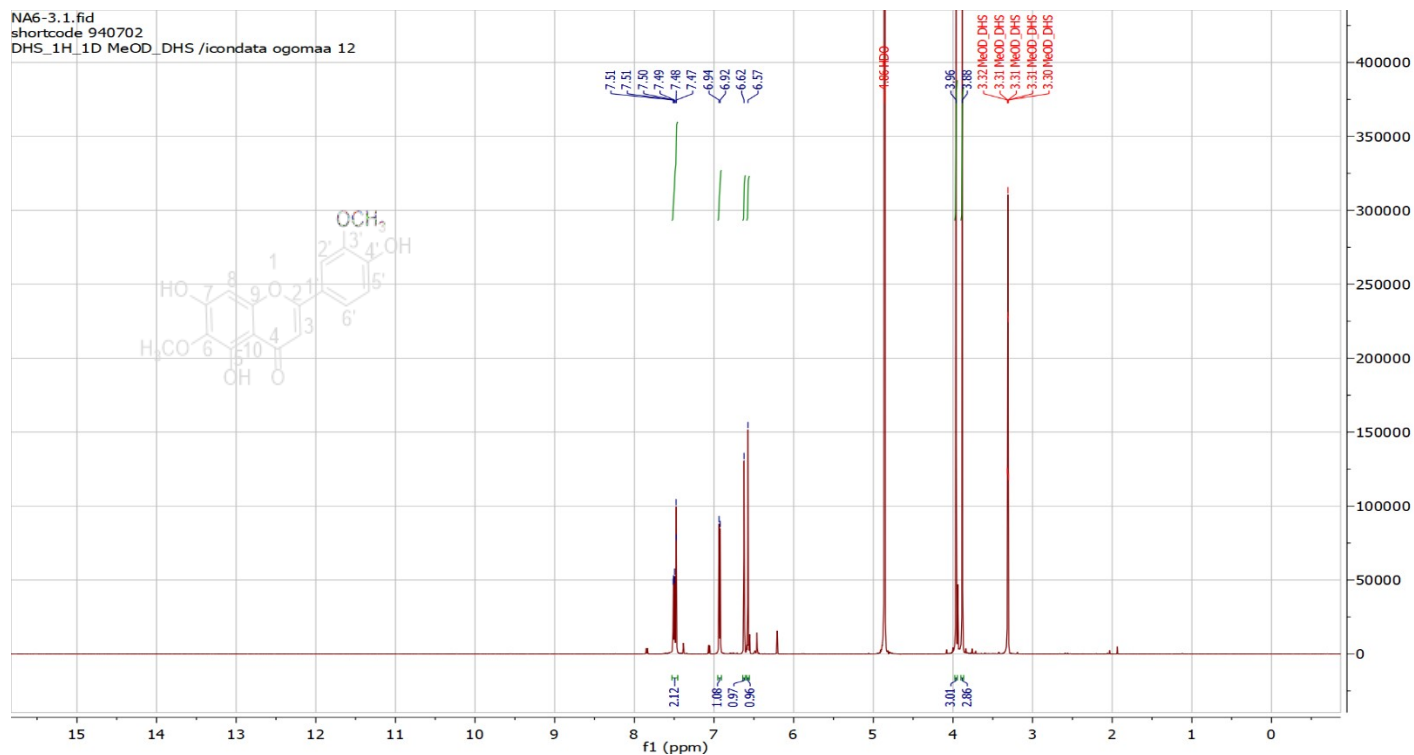

Figure S. 22:  $^1\text{H}$ -NMR spectrum of compound 4 (600 MHz,  $\text{CD}_3\text{OD}$ ).

Spectrum from 201028-IDA-NEG-SM0084.wiff (sample 1) - 2...84, Experiment 3, -TOF MS<sup>2</sup> (50 - 1000) from 11.708 min  
Precursor: 329.1 Da

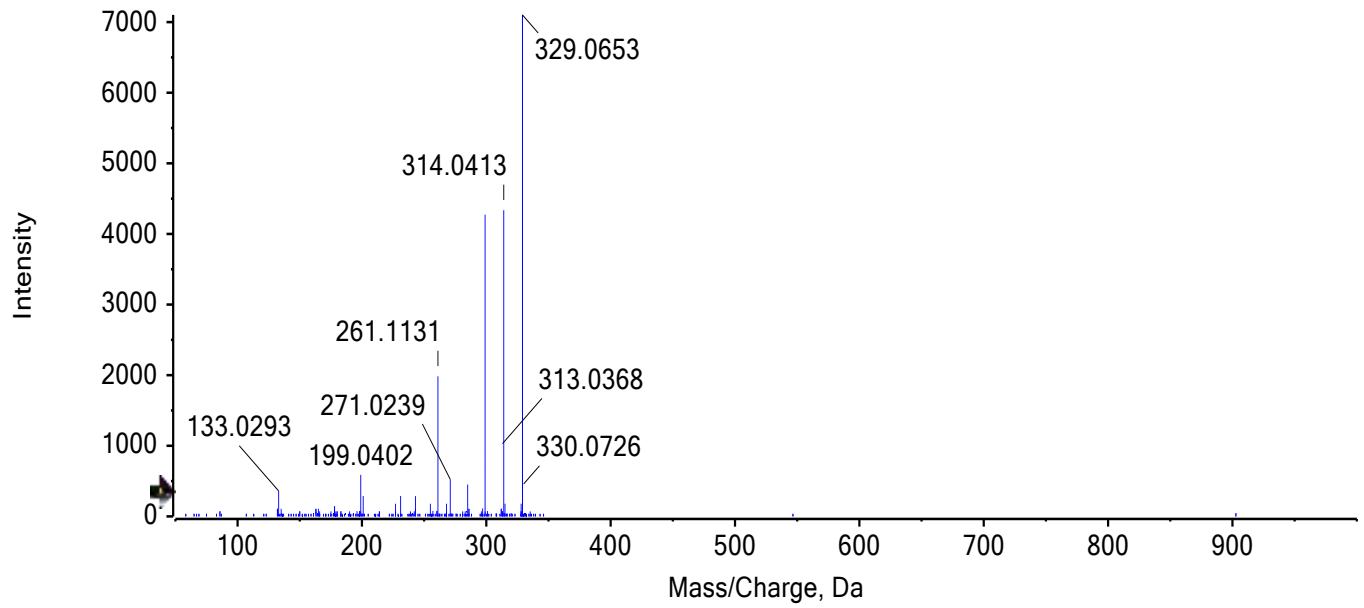

**Figure S. 23: LC-MS/MS of compound 4**

## Spectroscopic data of compound 5

NA6-2.1.fid  
shortcode 940702  
DHS\_1H\_1D MeOD\_DHS /icondata ogomaa 11

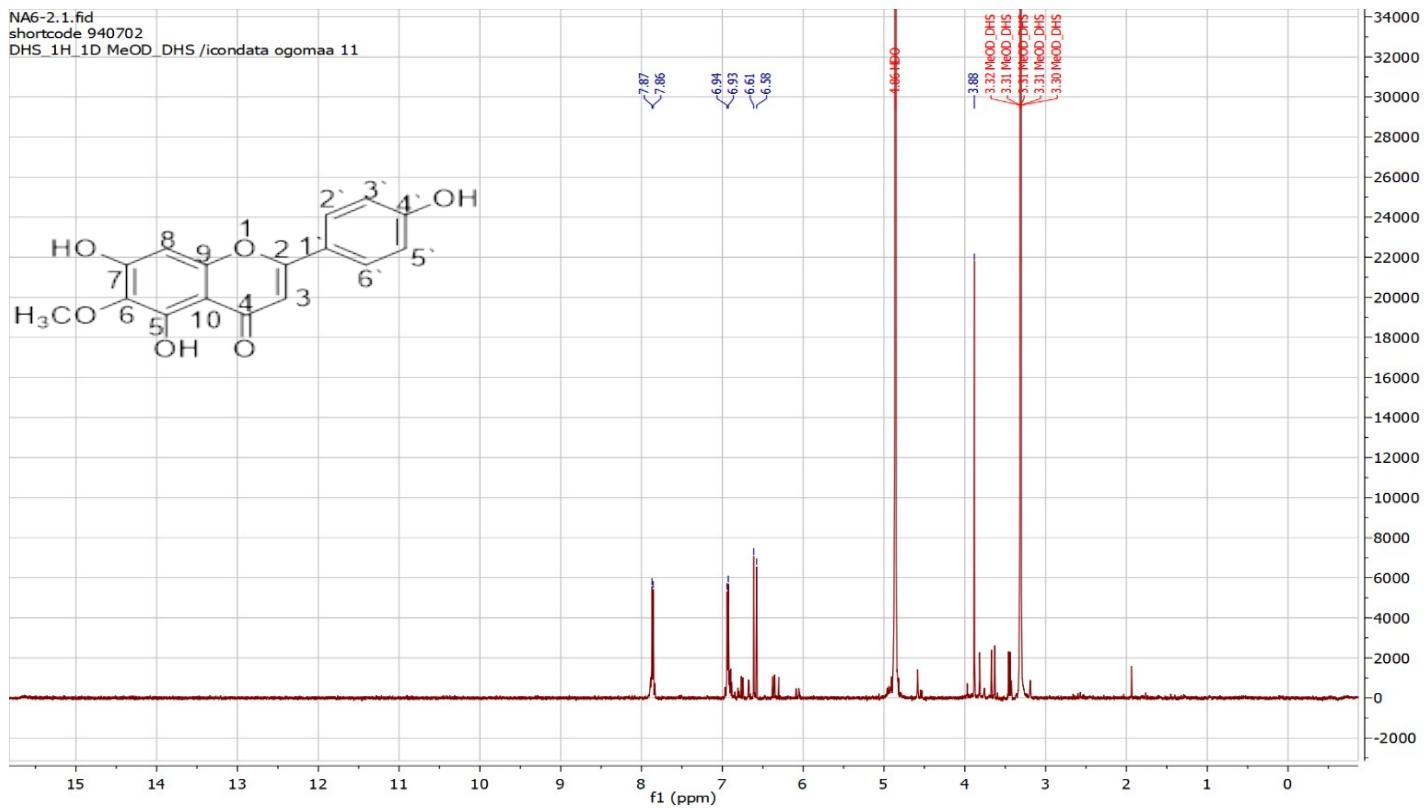



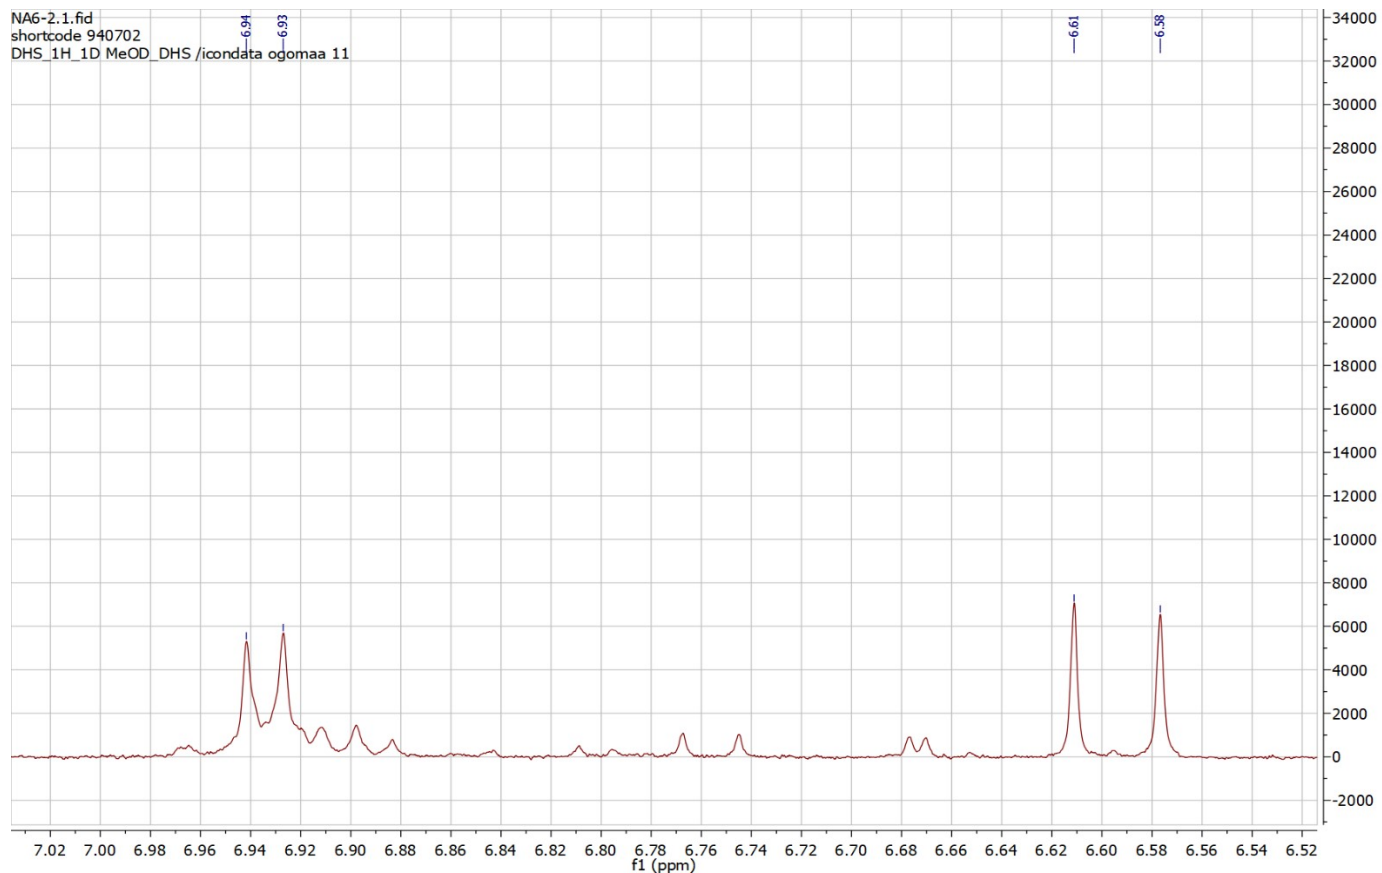

Figure S. 25: Partial expansion of <sup>1</sup>H-NMR spectrum of compound 5 (600 MHz, CD<sub>3</sub>OD).

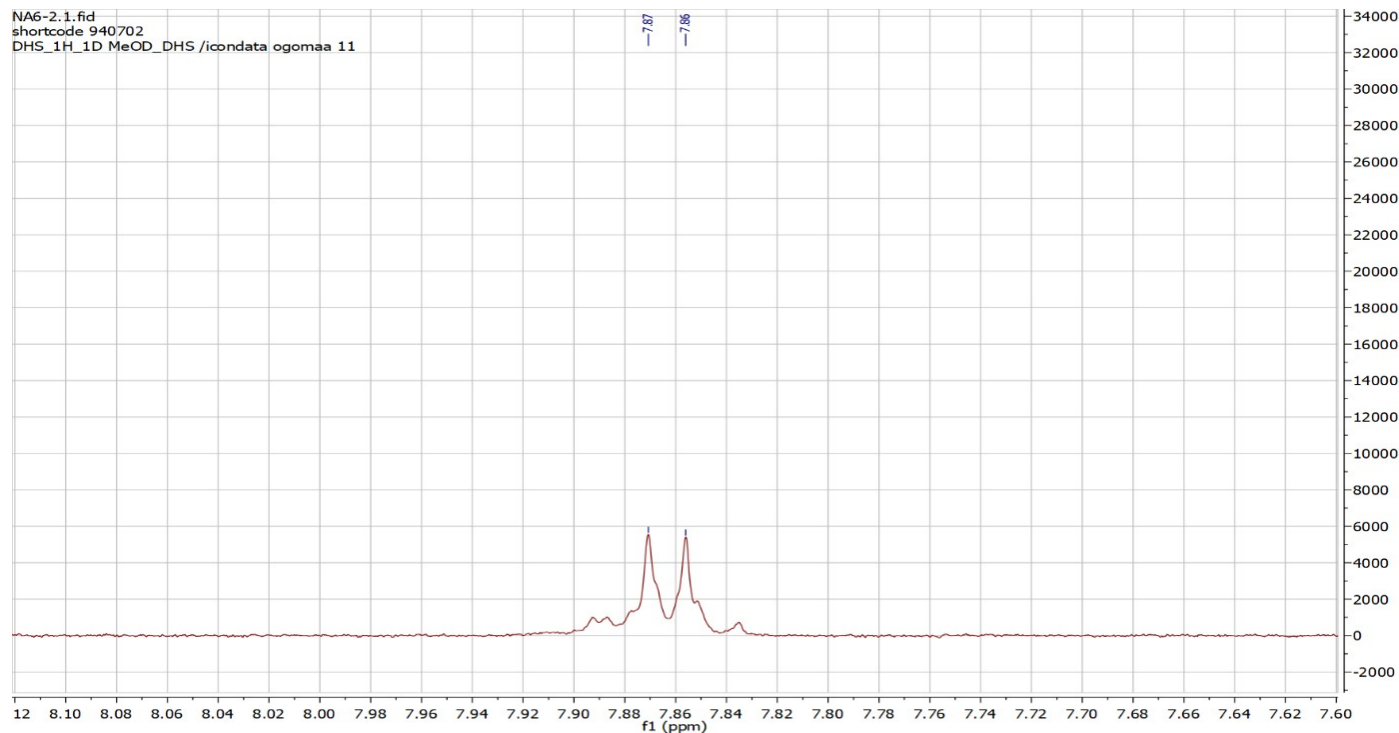

Figure S. 26: Partial expansion of <sup>1</sup>H-NMR spectrum of compound 5 (600 MHz, CD<sub>3</sub>OD).

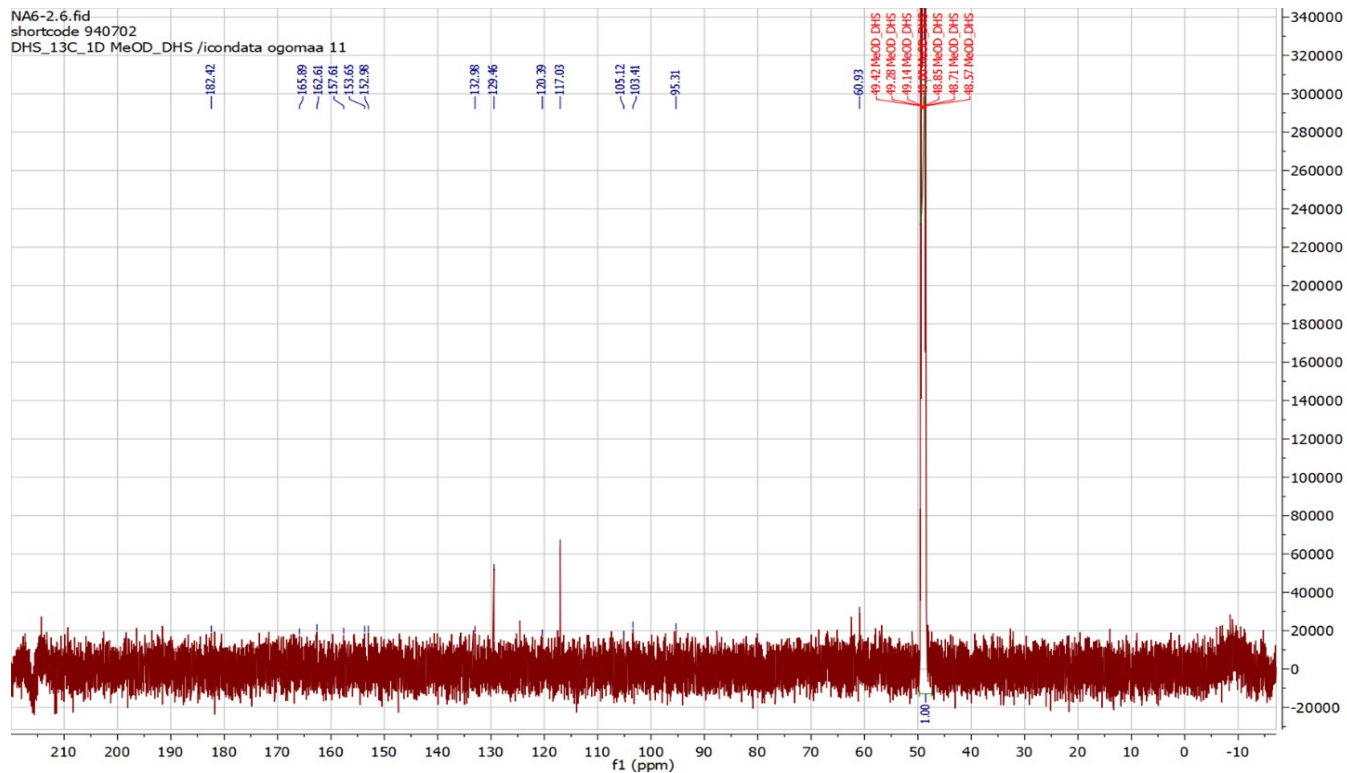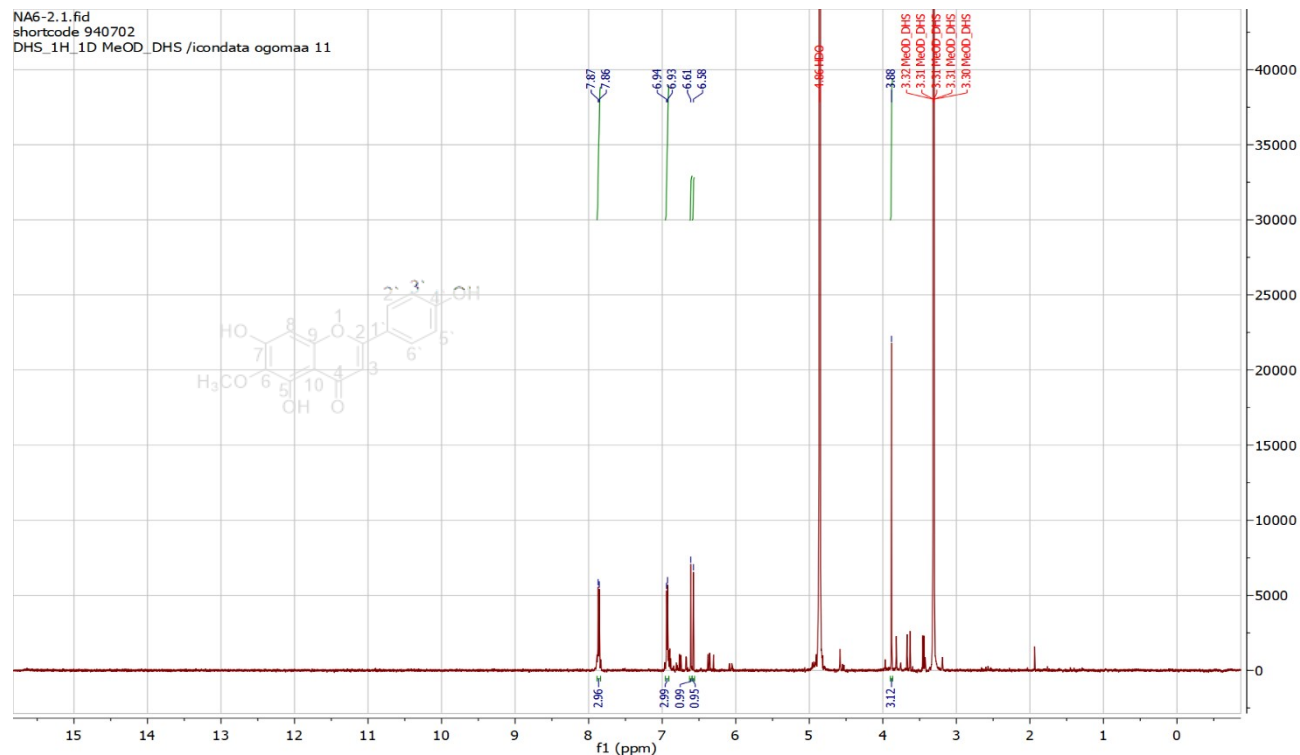

Spectrum from 201028-IDA-NEG-SM0084.wiff (sample ...periment 4, -TOF MS^2 (50 - 1000) from 12.845 min  
Precursor: 299.1 Da

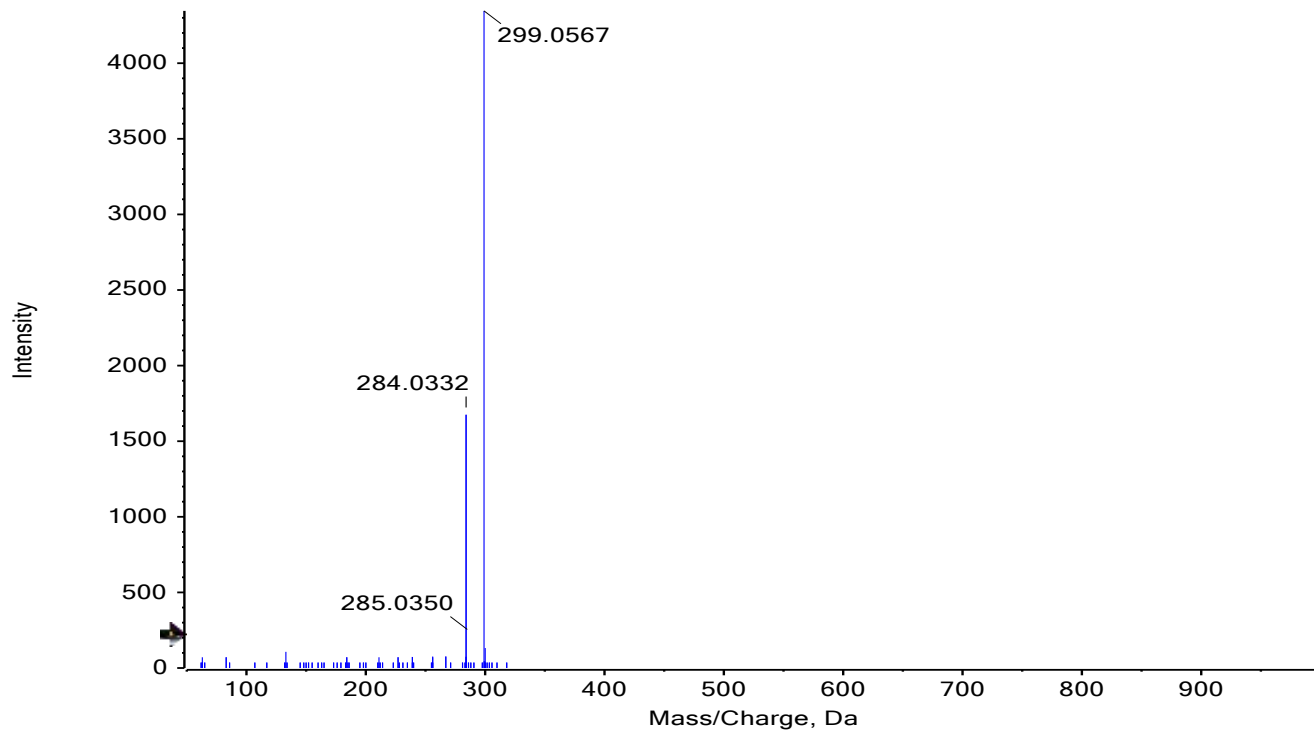

Figure S. 29: LC-MS/MS of compound 5

### Spectroscopic data of compound 6

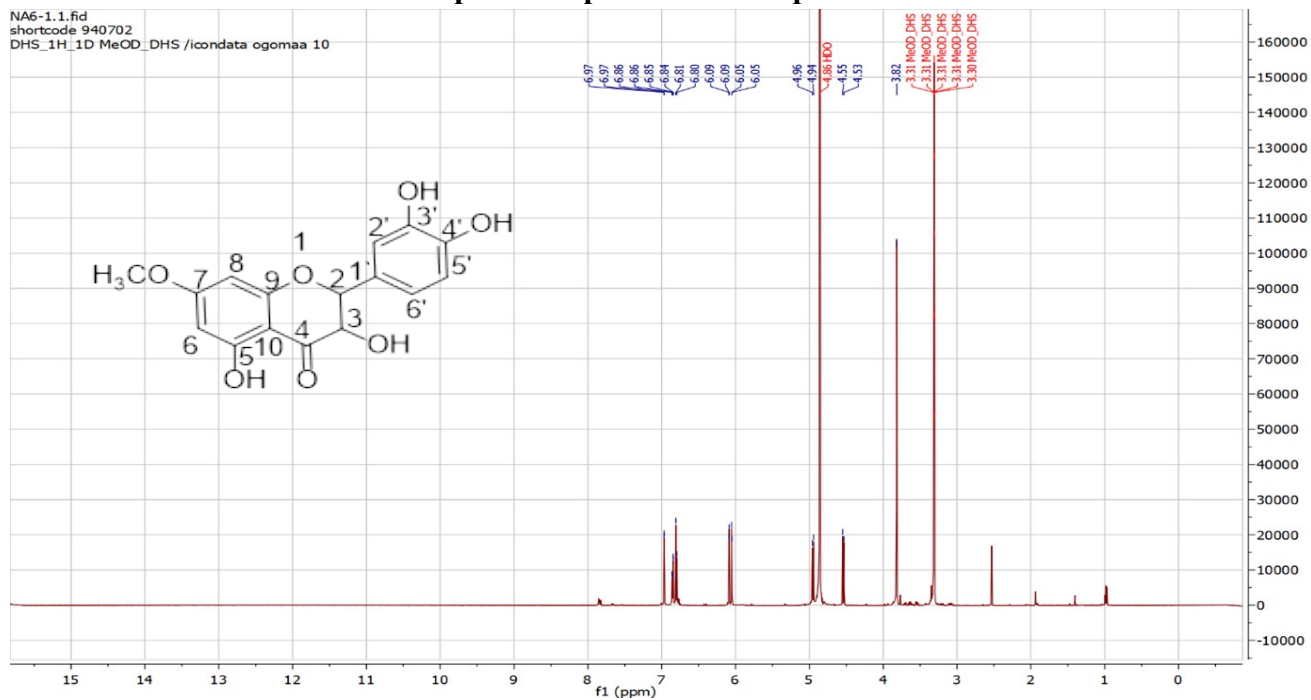

Figure S. 30: <sup>1</sup>H-NMR spectrum of compound 6 (600 MHz, CD<sub>3</sub>OD).



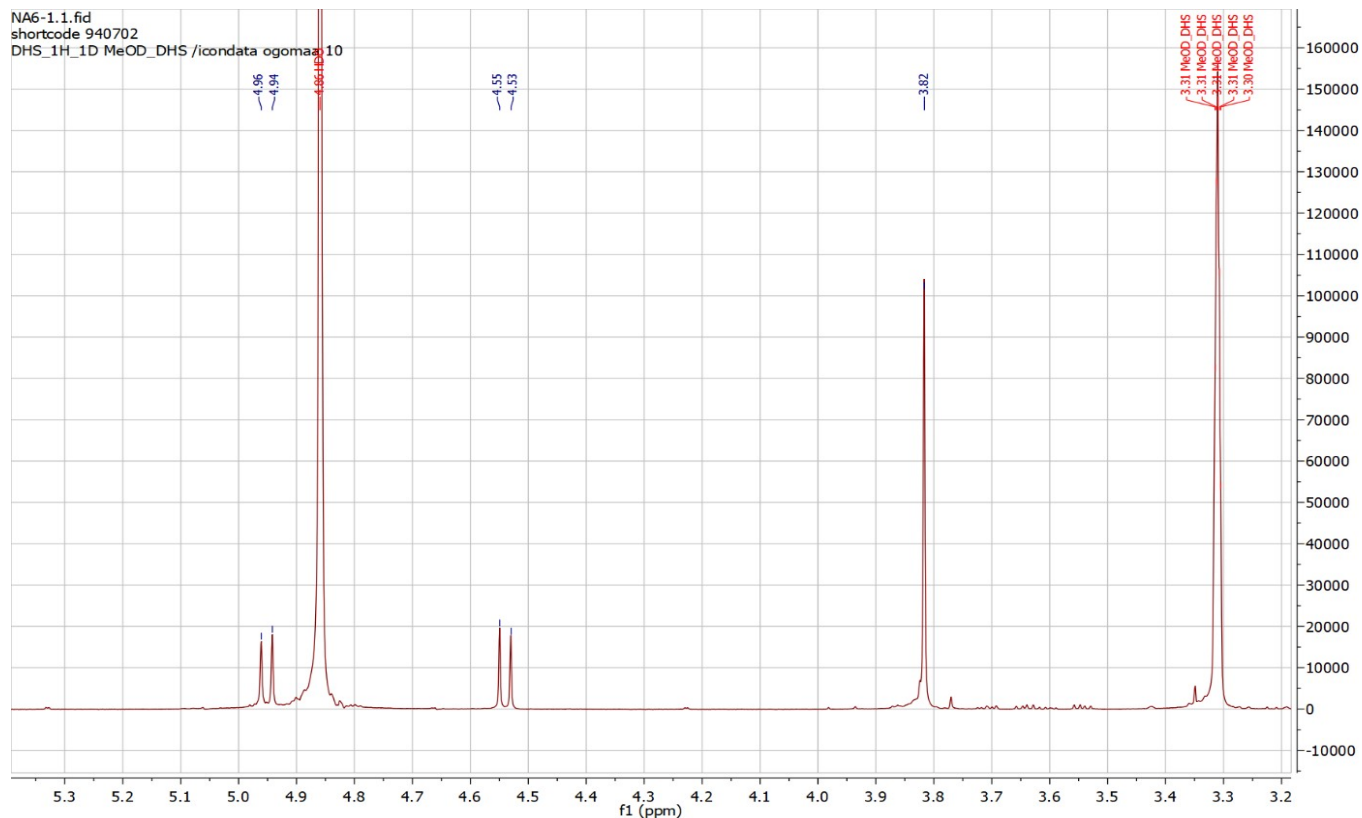

Figure S. 31: Partial expansion of  $^1\text{H}$ -NMR spectrum of compound 6 (600 MHz,  $\text{CD}_3\text{OD}$ ).

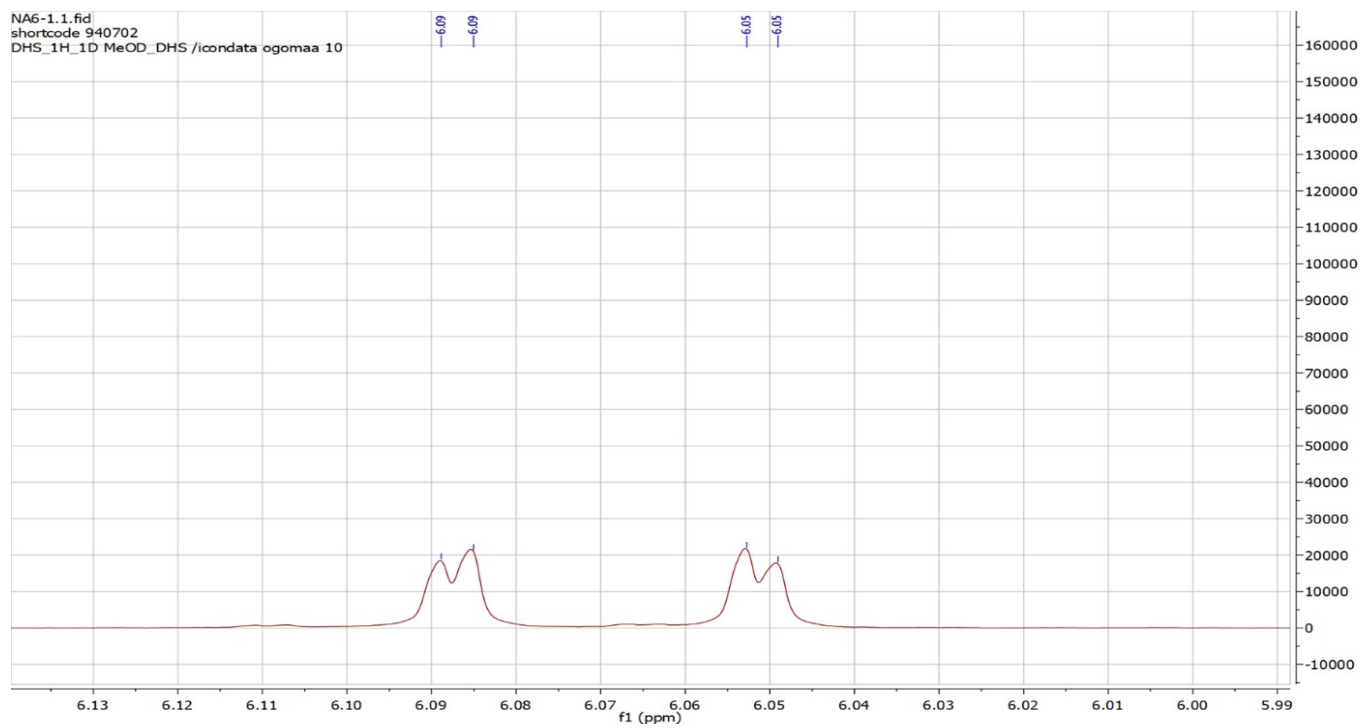

Figure S. 32: Partial expansion of  $^1\text{H}$ -NMR spectrum of compound 6 (600 MHz,  $\text{CD}_3\text{OD}$ ).

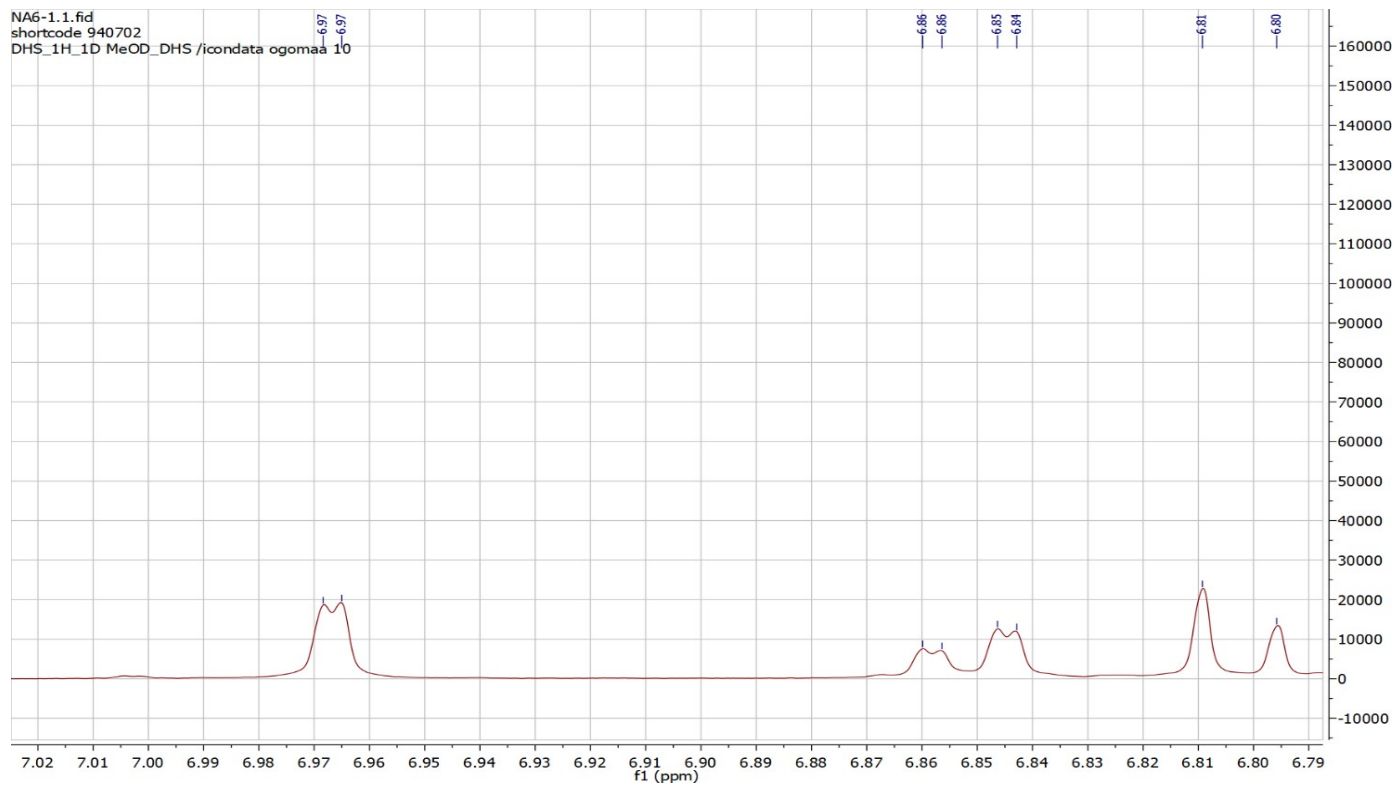

Figure S. 33: Partial expansion of  $^1\text{H}$ -NMR spectrum of compound 6 (600 MHz,  $\text{CD}_3\text{OD}$ ).

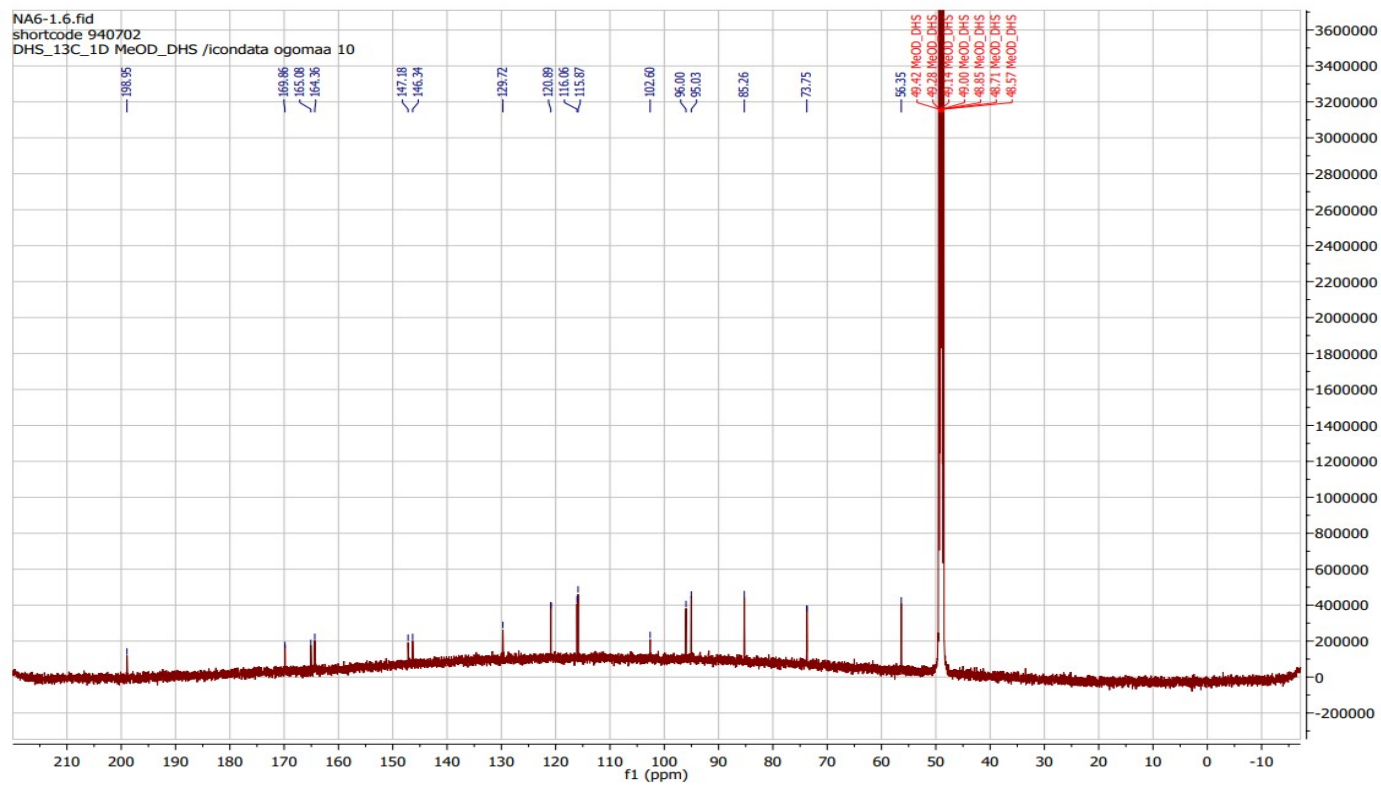

Figure S. 34:  $^{13}\text{C}$ -NMR spectrum of compound 6 (150 MHz,  $\text{CD}_3\text{OD}$ ).

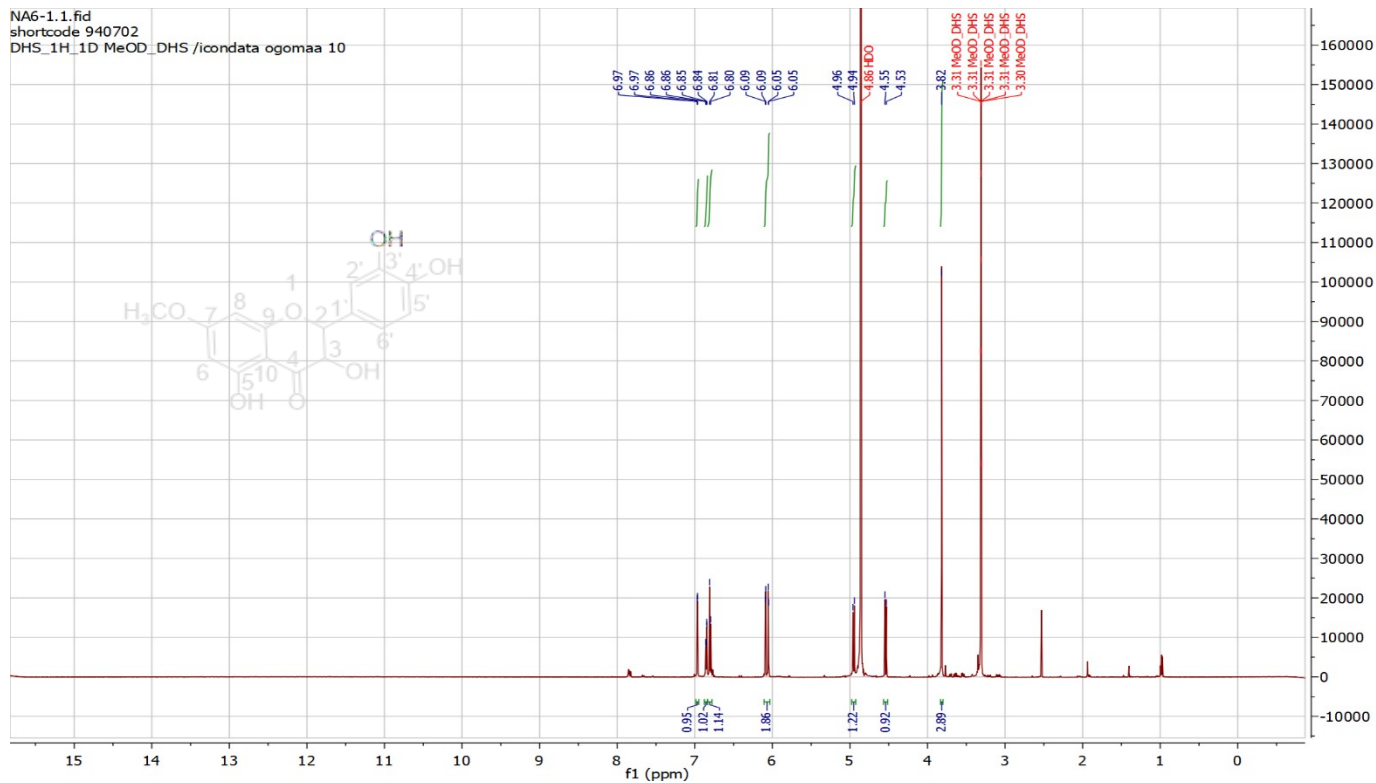

Figure S. 35:  $^1\text{H-NMR}$  spectrum of compound 6 (600 MHz,  $\text{CD}_3\text{OD}$ ).

Spectrum from 201101-IDA-POS-SM0084.wiff (sample 1) - 2...4, Experiment 7, +TOF MS<sup>2</sup> (50 - 1000) from 11.027 min  
 Precursor: 319.1 Da, CE: 35.0

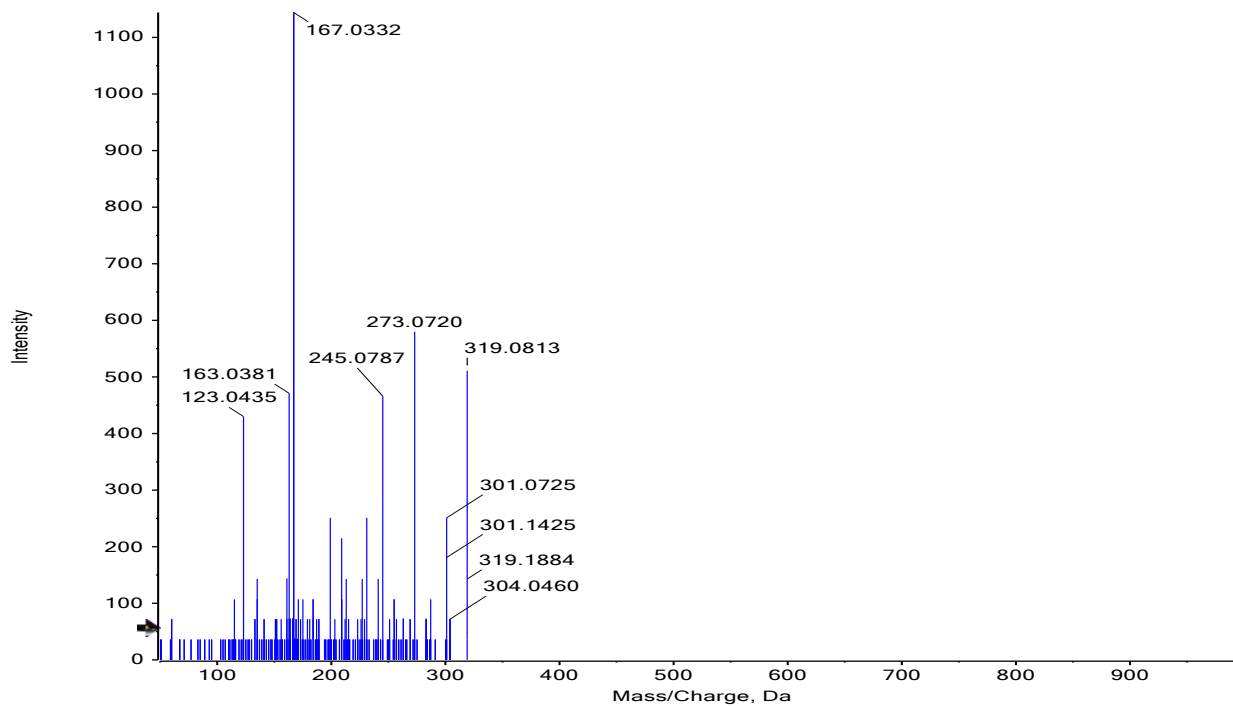

Figure S. 36: LC-MS/MS of compound 6

## Spectroscopic data of compound 7

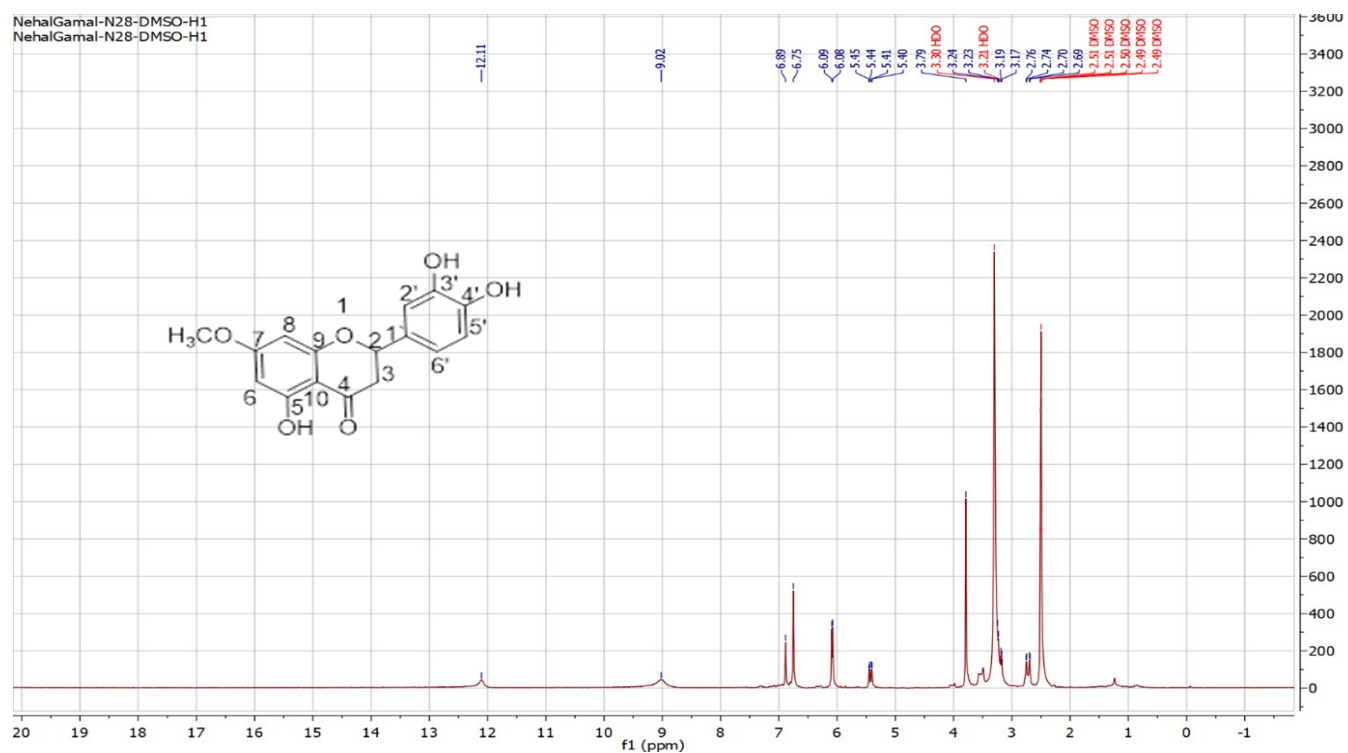

Figure S. 37: <sup>1</sup>H-NMR spectrum of compound 7 (300 MHz, DMSO-d<sub>6</sub>)

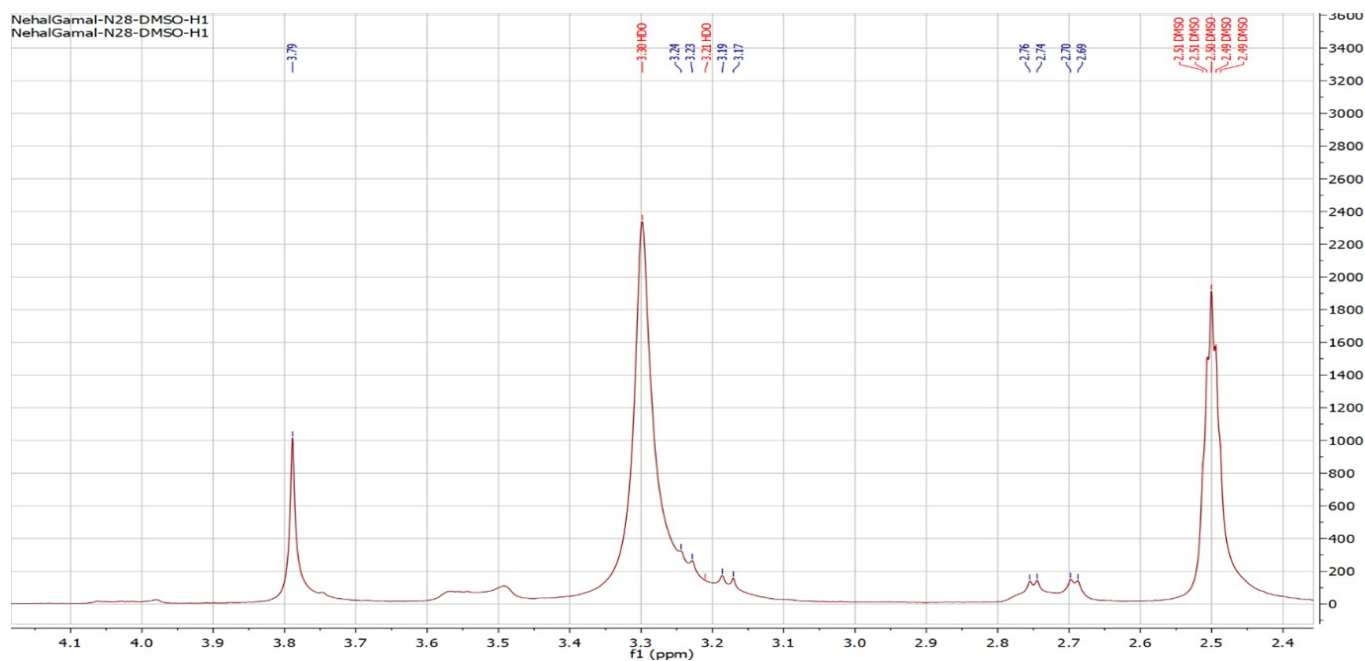

Figure S. 38: Partial expansion of <sup>1</sup>H-NMR spectrum of compound 7 (300 MHz, DMSO-d<sub>6</sub>).

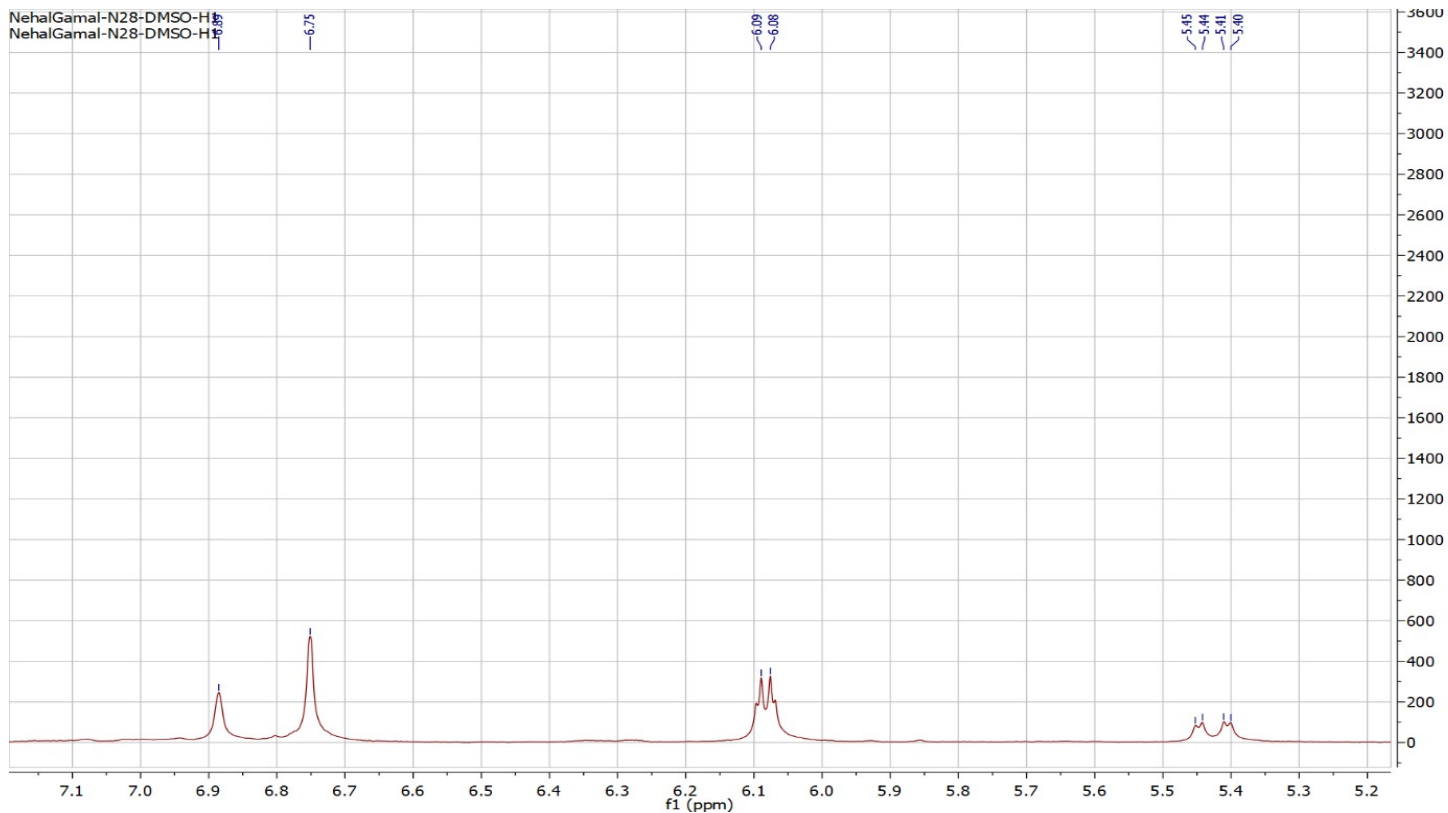

Figure S. 39: Partial expansion of <sup>1</sup>H-NMR spectrum of compound 7 (300 MHz, DMSO-d<sub>6</sub>).

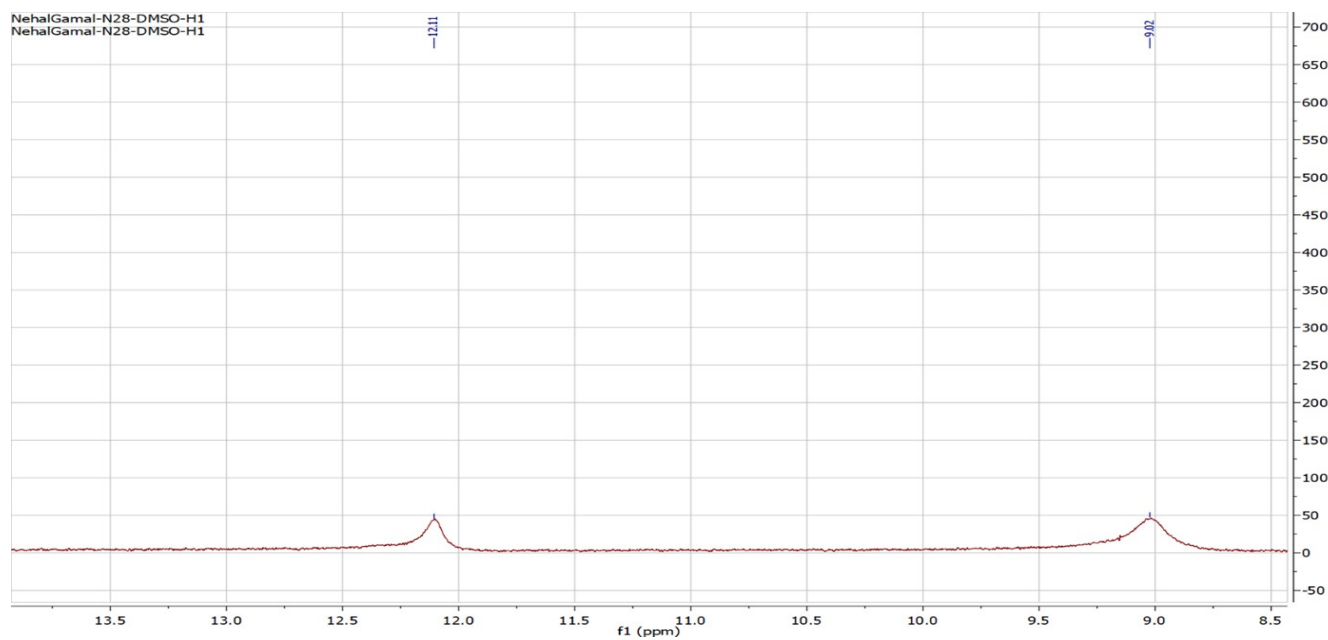

Figure S. 40: Partial expansion of <sup>1</sup>H-NMR spectrum of compound 7 (300 MHz, DMSO-d<sub>6</sub>).

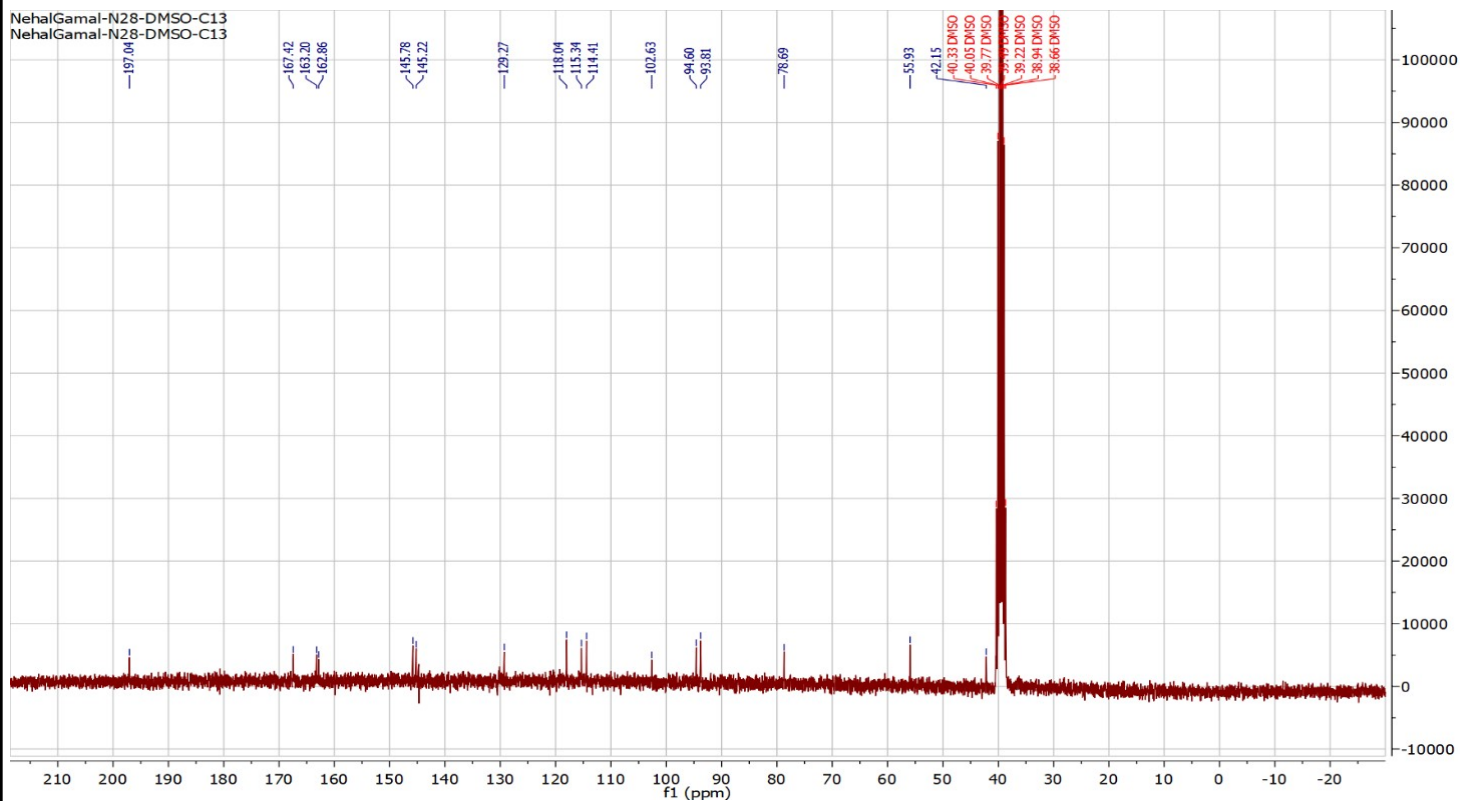

Figure S. 41:  $^{13}\text{C}$ -NMR spectrum of compound 7 (75 MHz,  $\text{DMSO-}d_6$ ).

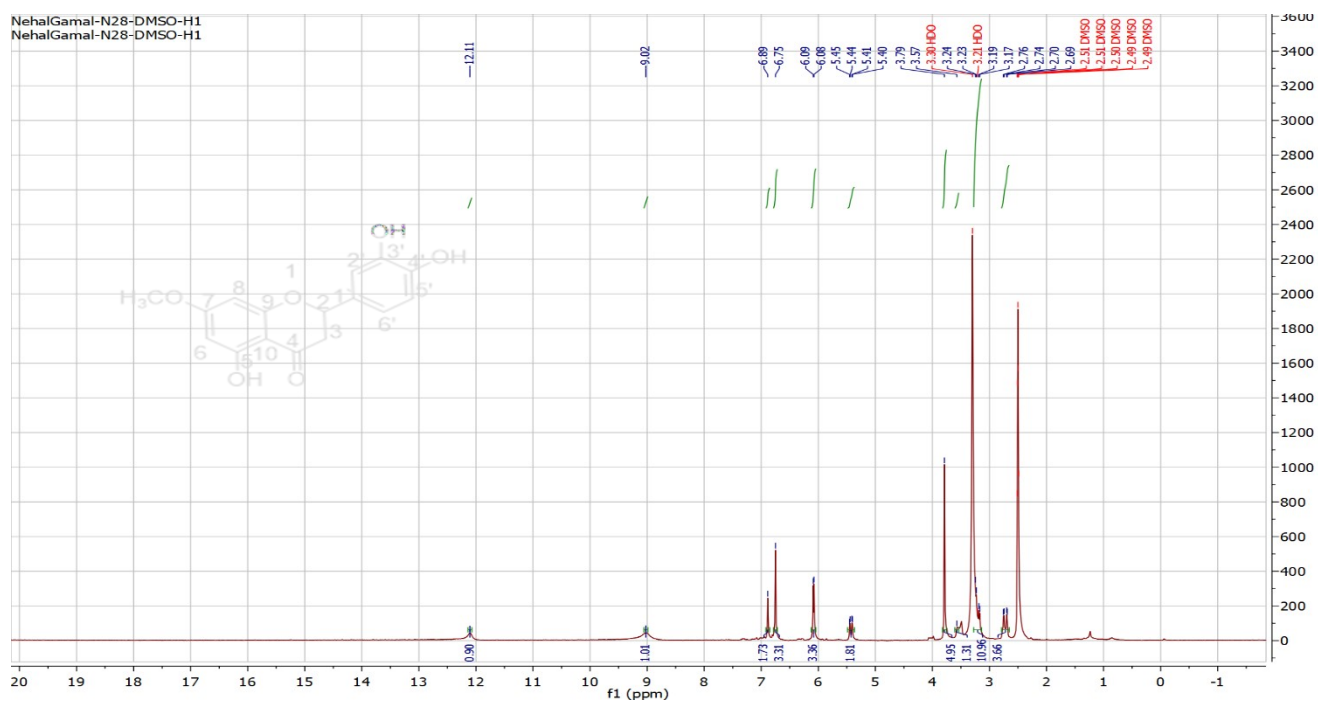

Figure S. 42:  $^1\text{H}$ -NMR spectrum of compound 7 (300 MHz,  $\text{DMSO-}d_6$ )

Spectrum from 201101-IDA-POS-SM0084.wiff (sample 1) - 2...4, Experiment 3, +TOF MS^2 (50 - 1000) from 12.518 min  
 Precursor: 303.1 Da, CE: 35.0

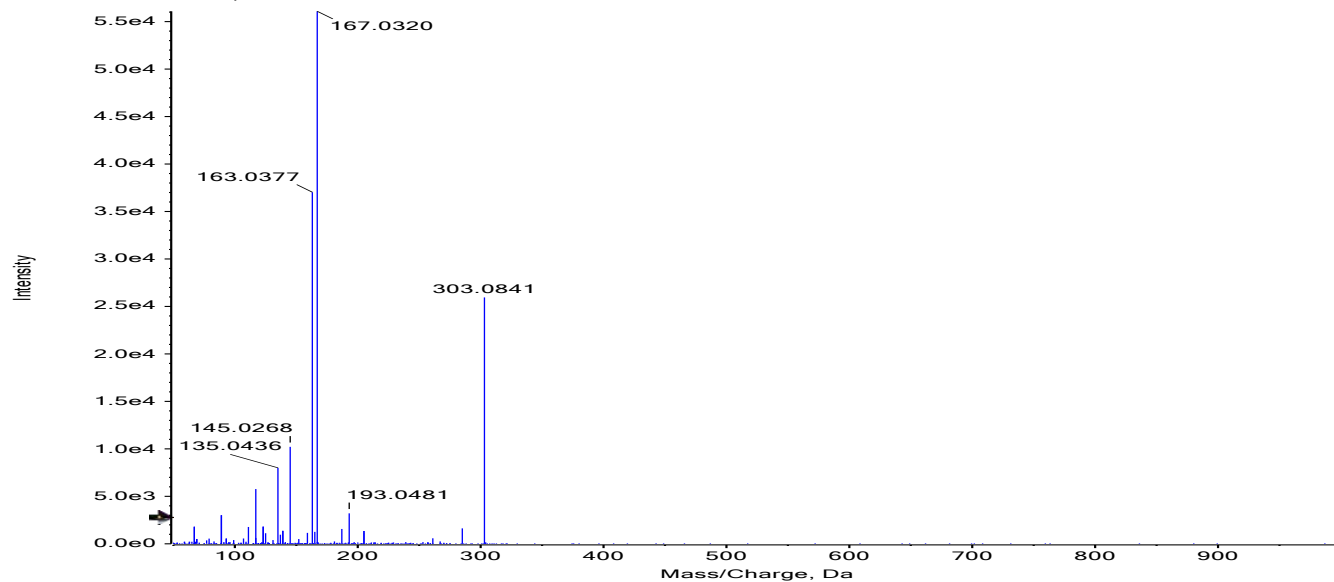

Figure S. 43: LC-MS/MS of compound 7

Spectroscopic data of compound 8

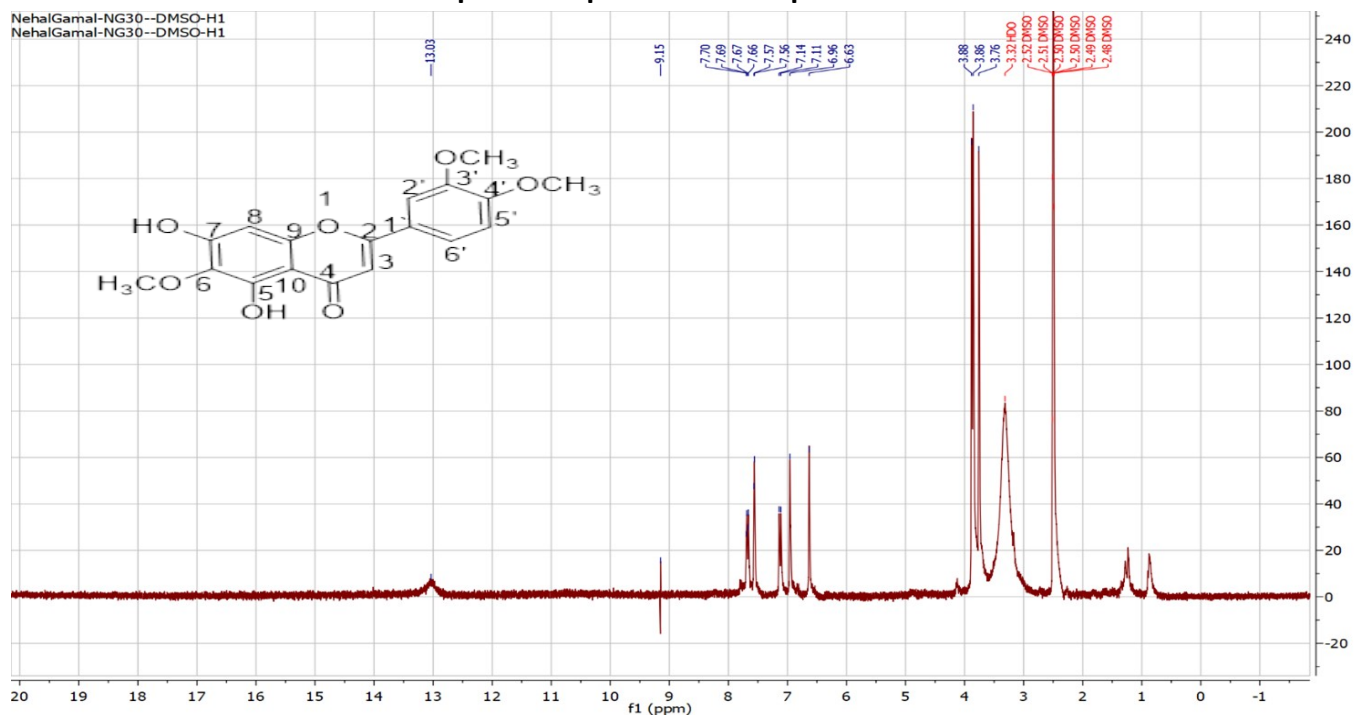

Figure S. 44: <sup>1</sup>H-NMR spectrum of compound 8 (300 MHz, DMSO-d<sub>6</sub>).

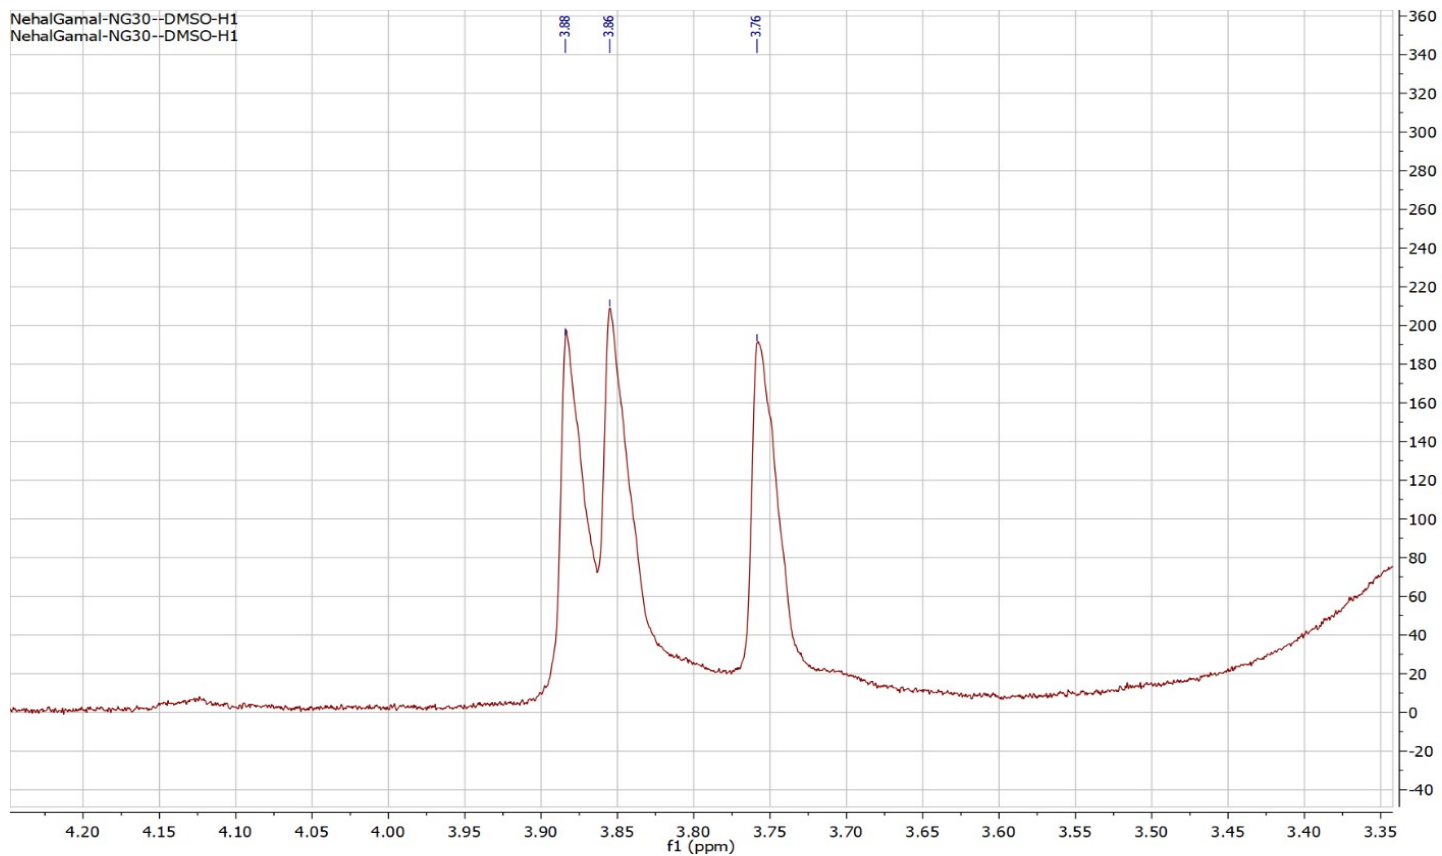

Figure S. 45: Partial expansion of <sup>1</sup>H-NMR spectrum of compound 8 (300 MHz, DMSO-*d*<sub>6</sub>).

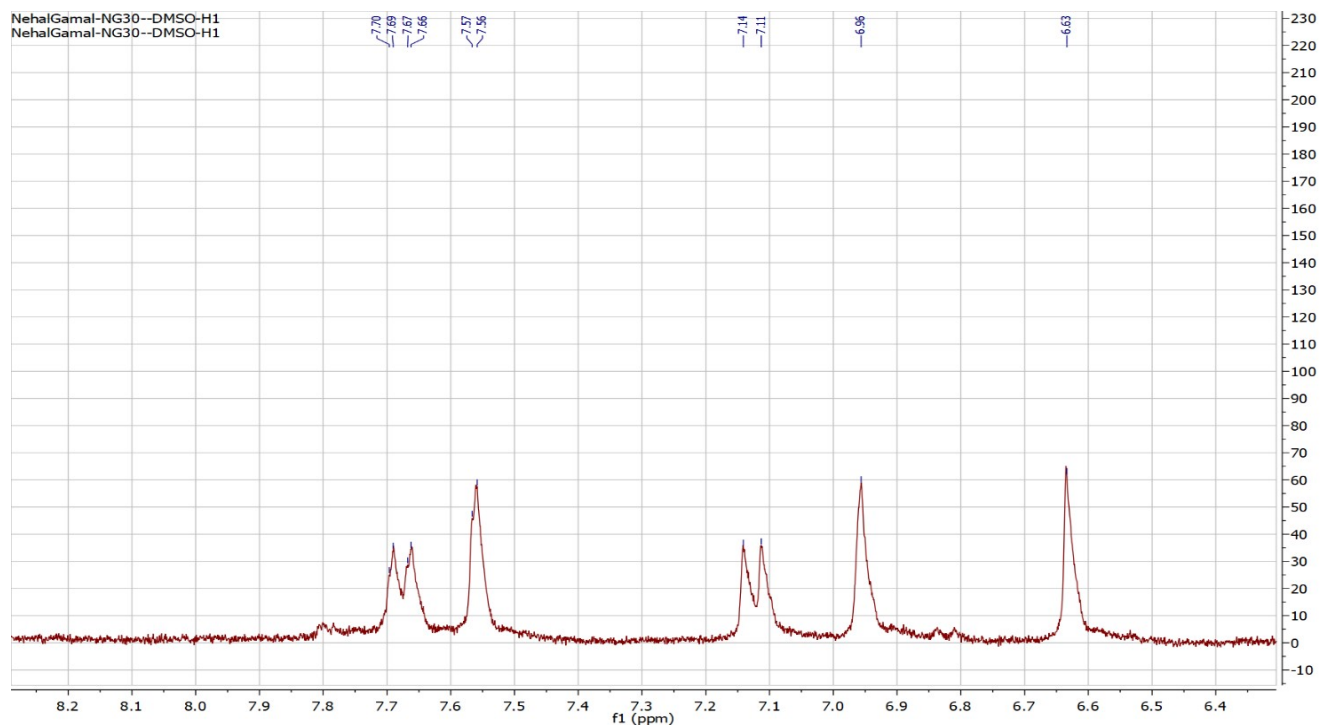

Figure S. 46: Partial expansion of <sup>1</sup>H-NMR spectrum of compound 8 (300 MHz, DMSO-*d*<sub>6</sub>).



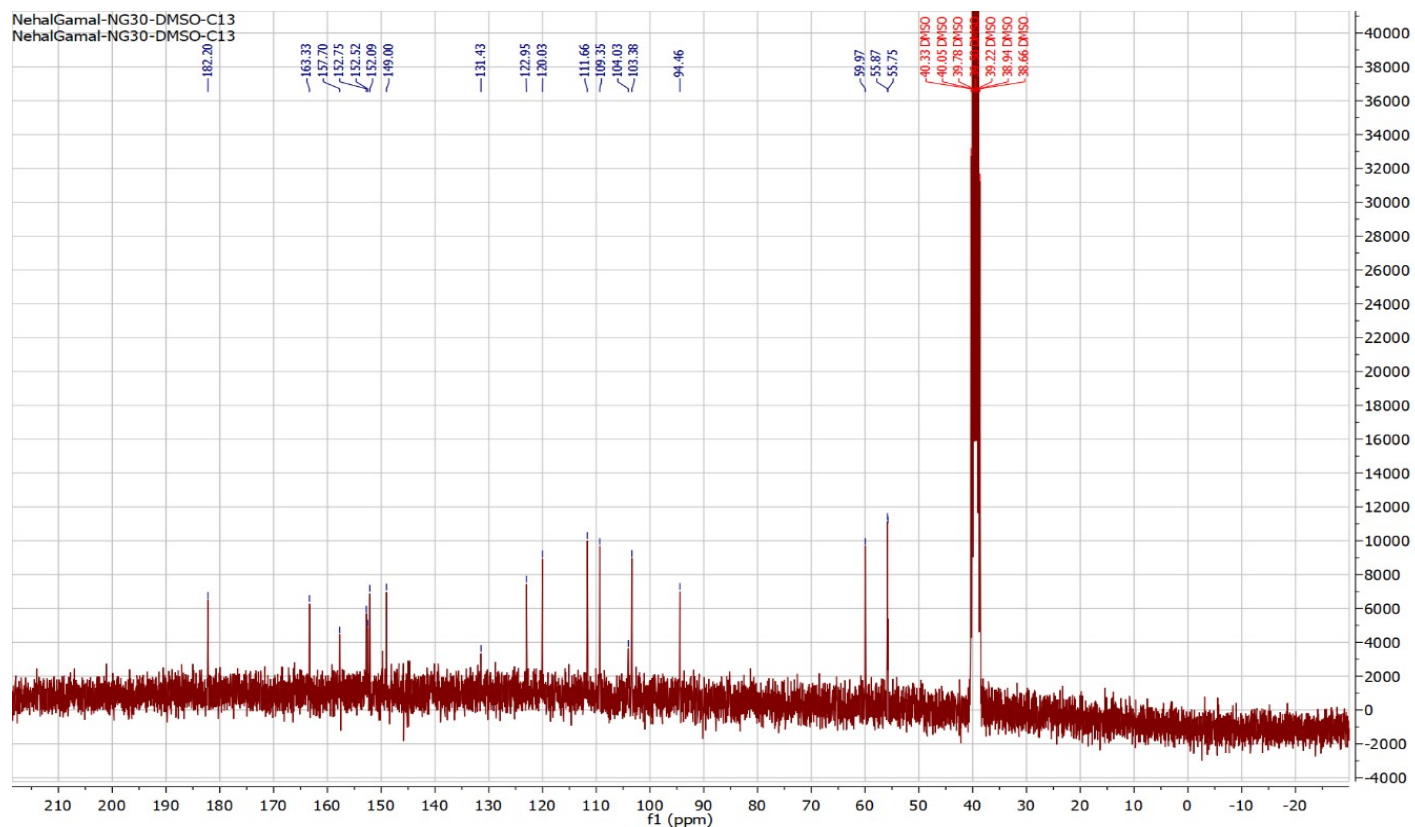

Figure S. 47:  $^{13}\text{C}$ -NMR spectrum of compound 8 (300 MHz,  $\text{DMSO-}d_6$ ).

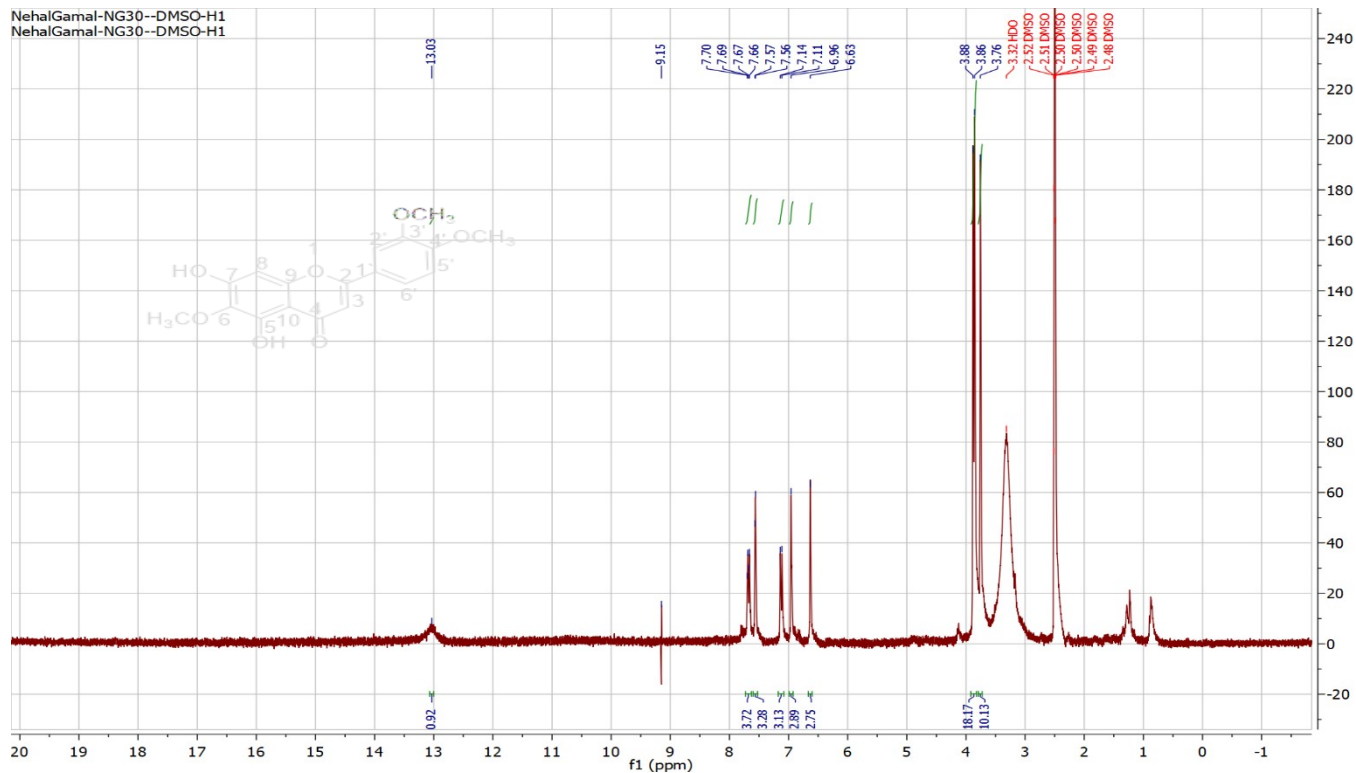

Figure S. 48:  $^1\text{H}$ -NMR spectrum of compound 8 (300 MHz,  $\text{DMSO-}d_6$ ).

Spectrum from 201101-IDA-POS-SM0084.wiff (sample 1) - 2...4, Experiment 7, +TOF MS<sup>2</sup> (50 - 1000) from 16.529 min  
Precursor: 345.1 Da, CE: 35.0

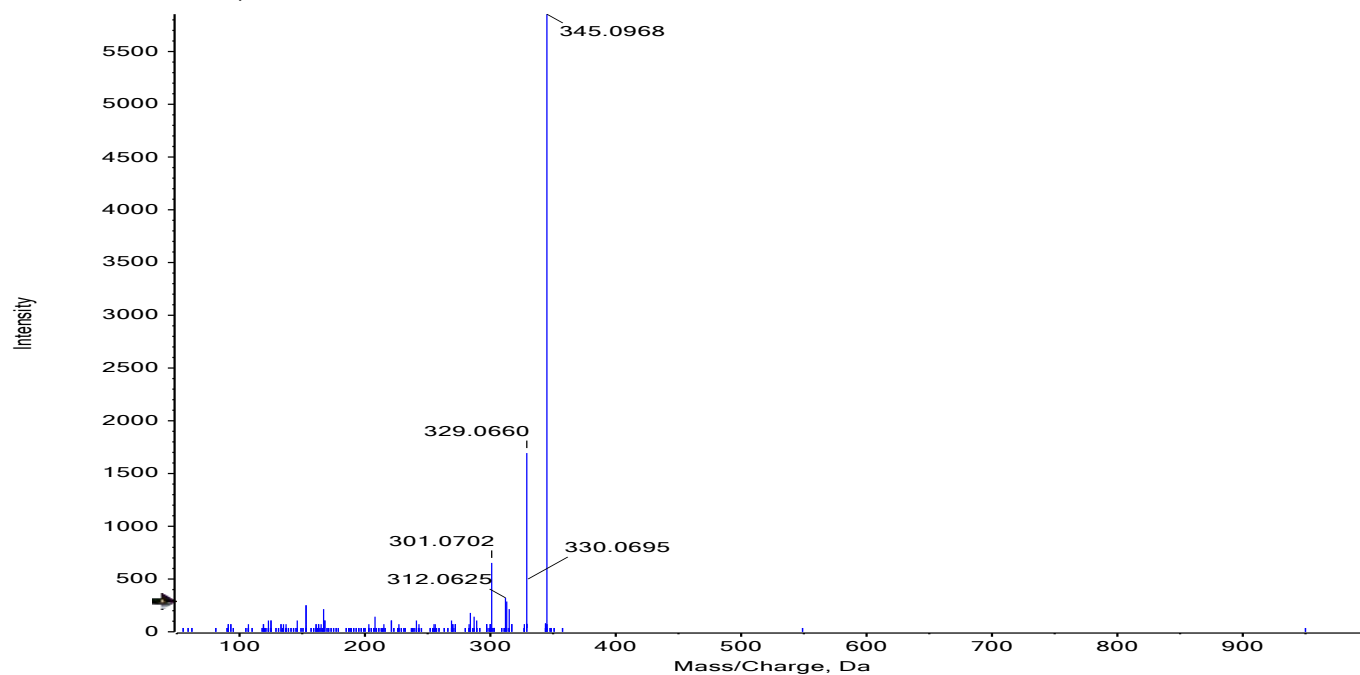

Figure S. 49: LC-MS/MS of compound 8

Table S. 1: <sup>1</sup>H (300 MHz) and <sup>13</sup>C (75 MHz) NMR spectroscopic data of compound 1 (DMSO-*d*<sub>6</sub> δ in ppm, *J* in Hz).

| Position | δ <sub>c</sub> (ppm) | δ <sub>H</sub> ppm (No. of H, <i>m</i> , <i>J</i> Hz)                                 | Position | δ <sub>c</sub> (ppm) | δ <sub>H</sub> ppm (No. of H, <i>m</i> , <i>J</i> Hz) |
|----------|----------------------|---------------------------------------------------------------------------------------|----------|----------------------|-------------------------------------------------------|
| 1        | 38.3                 | 2.37 (1H, <i>m</i> ) & 2.12 (1H, <i>m</i> )                                           | 21       | 18.6                 | 0.90 (3H, <i>d</i> , <i>J</i> = 6.2 Hz)               |
| 2        | 33.3                 | 1.33 (2H, <i>m</i> )                                                                  | 22       | 138.1                | 5.16 (1H, <i>dd</i> , <i>J</i> = 15.1, 8.4 Hz)        |
| 3        | 76.9                 | 3.44 (1H, <i>m</i> )                                                                  | 23       | 128.8                | 5.02 (1H, <i>dd</i> , <i>J</i> = 15.2, 8.1 Hz)        |
| 4        | 36.8                 | 1.80 (1H, <i>br d</i> , <i>J</i> = 10.7 Hz) & 1.17 (1H, <i>d</i> , <i>J</i> = 6.7 Hz) | 24       | 31.3                 | 0.98 (1H, <i>br s</i> )                               |
| 5        | 140.4                | —                                                                                     | 25       | 31.3                 | 1.64 (1H, <i>m</i> )                                  |
| 6        | 121.2                | 5.32 (1H, <i>br d</i> , <i>J</i> = 4.7 Hz)                                            | 26       | 19.1                 | 0.82 (3H, <i>d</i> , <i>J</i> = 6.2 Hz)               |
| 7        | 31.4                 | 1.42 (2H, <i>m</i> )                                                                  | 27       | 18.9                 | 0.81 (3H, <i>d</i> , <i>J</i> = 6.2                   |

|    |      |                                                   |       |       | Hz)                                     |
|----|------|---------------------------------------------------|-------|-------|-----------------------------------------|
| 8  | 31.4 | 1.51 (1H, <i>br s</i> )                           | 28    | 23.9  | 0.96 (2H, <i>br s</i> )                 |
| 9  | 49.6 | 1.00 (1H, <i>br s</i> )                           | 29    | 11.7  | 0.78 (3H, <i>d</i> , <i>J</i> = 6.5 Hz) |
| 10 | 36.2 | —                                                 | 1`    | 100.8 | 4.21 (1H, <i>d</i> , <i>J</i> = 7.5 Hz) |
| 11 | 22.6 | 1.20 (2H, <i>m</i> )                              | 2`    | 70.1  | 2.89 (1H, <i>m</i> )                    |
| 12 | 41.7 | 2.04 (1H, <i>m</i> ) & 1.15 (1H, <i>m</i> )       | 3`    | 76.8  | 3.14 (1H, <i>m</i> )                    |
| 13 | 41.9 | —                                                 | 4`    | 73.5  | 3.08 (1H, <i>m</i> )                    |
| 14 | 56.3 | 1.00 (1H, <i>m</i> )                              | 5`    | 76.8  | 3.04 (1H, <i>m</i> )                    |
| 15 | 24.9 | 1.13 (2H, <i>m</i> )                              | 6`    | 61.1  | 3.64 (2H, <i>m</i> )                    |
| 16 | 29.3 | 1.94 (1H, <i>br s</i> ) & 1.78 (1H, <i>br s</i> ) | 2`-OH |       | 4.82 ( <i>br s</i> )                    |
| 17 | 56.2 | 1.00 (1H, <i>m</i> )                              | 3`-OH |       | 4.85 ( <i>br s</i> )                    |
| 18 | 11.9 | 0.65 (3H, <i>s</i> )                              | 4`-OH |       | 4.81 ( <i>br s</i> )                    |
| 19 | 18.9 | 0.96 (3H, <i>br s</i> )                           | 6`-OH |       | 4.38 ( <i>t</i> , <i>J</i> = 5.6 Hz)    |
| 20 | 35.5 | 1.36 (1H, <i>m</i> )                              |       |       |                                         |

Table S. 2 <sup>1</sup>H (300 MHz) and <sup>13</sup>C (75 MHz) NMR spectroscopic data of compound 2 (DMSO-*d*<sub>6</sub> δ in ppm, *J* in Hz).

| Position | δ <sub>c</sub> (ppm) | δ <sub>H</sub> ppm (No. of H, <i>m</i> , <i>J</i> Hz) |
|----------|----------------------|-------------------------------------------------------|
| 2        | 162.1                |                                                       |
| 3        | 106.8                | 7.09 (1H, <i>s</i> )                                  |
| 4        | 182.3                |                                                       |
| 5        | 152.7                |                                                       |
| 6        | 131.7                |                                                       |
| 7        | 158.6                |                                                       |
| 8        | 91.7                 | 6.94 (1H, <i>s</i> )                                  |
| 9        | 153.3                |                                                       |
| 10       | 104.4                |                                                       |
| 1`       | 106.8                |                                                       |
| 2`       | 152.0                |                                                       |

|         |       |               |
|---------|-------|---------------|
| 3'      | 104.9 | 6.56 (1H, s)  |
| 4'      | 152.0 |               |
| 5'      | 141.7 |               |
| 6'      | 111.8 | 7.44 (1H, s)  |
| 6-OCH3  | 60.1  | 3.93 (3H, s)  |
| 7-OCH3  | 56.8  | 3.81 (3H, s)  |
| OCH3-5' | 56.6  | 3.73 (3H, s)  |
| 5-OH    |       | 13.03 (1H, s) |
| 2'-OH   |       | 10.47 (1H, s) |
| 4'-OH   |       | 10.04 (1H, s) |

Table S. 3  $^1\text{H}$  (400 MHz) and  $^{13}\text{C}$  (100 MHz) NMR spectroscopic data of compound 3 (DMSO- $d_6$   $\delta$  in ppm,  $J$  in Hz).

| Position | $\delta_c$ (ppm) | $\delta_H$ ppm (No. of H, $m$ , $J$ Hz) |
|----------|------------------|-----------------------------------------|
| 2        | 147.7            |                                         |
| 3        | 136.5            |                                         |
| 4        | 176.1            |                                         |
| 5        | 160.8            |                                         |
| 6        | 97.9             | 6.36 (1H, $d$ , $J = 2.2$ Hz)           |
| 7        | 165.4            |                                         |
| 8        | 92.4             | 6.71 (1H, $d$ , $J = 2.2$ Hz)           |
| 9        | 156.5            |                                         |
| 10       | 104.5            |                                         |
| 1'       | 122.3            |                                         |
| 2'       | 115.7            | 7.73 (1H, $d$ , $J = 2.2$ Hz)           |
| 3'       | 145.5            |                                         |
| 4'       | 148.3            |                                         |
| 5'       | 116.0            | 6.90 (1H, $d$ , $J = 8.5$ Hz,)          |
| 6'       | 120.5            | 7.58 (1H, $dd$ , $J = 8.5, 2.2$ Hz,)    |
| 7-OCH3   | 56.5             | 3.87 (3H, s)                            |
| 3-OH     |                  | 9.51 (1H, s)                            |

|       |  |               |
|-------|--|---------------|
| 5-OH  |  | 12.50 (1H, s) |
| 3'-OH |  | 9.31 (1H, s)  |
| 4'-OH |  | 9.51 (1H, s)  |

Table S. 4  $^1\text{H}$  (600 MHz) and  $^{13}\text{C}$  (150 MHz) NMR spectroscopic data of compound 4 ( $\text{CD}_3\text{OD}$ ,  $\delta$  in ppm,  $J$  in Hz).

| Position            | $\delta_c$ (ppm) | $\delta_H$ ppm (No. of H, $m$ , $J$ Hz) |
|---------------------|------------------|-----------------------------------------|
| 2                   | 166.3            |                                         |
| 3                   | 103.8            | 6.62 (1H, s)                            |
| 4                   | 184.3            |                                         |
| 5                   | 154.7            |                                         |
| 6                   | 132.9            |                                         |
| 7                   | 158.7            |                                         |
| 8                   | 95.3             | 6.57 (1H, s)                            |
| 9                   | 154.0            |                                         |
| 10                  | 105.8            |                                         |
| 1'                  | 123.7            |                                         |
| 2'                  | 110.6            | 6.93 (1H, $d$ , $J = 8.8$ Hz)           |
| 3'                  | 152.1            |                                         |
| 4'                  | 149.5            |                                         |
| 5'                  | 116.8            | 7.47 (1H, $d$ , $J = 2$ Hz)             |
| 6'                  | 121.7            | 7.50 (1H, $dd$ , $J = 8.3, 2$ Hz)       |
| 6-OCH <sub>3</sub>  | 60.9             | 3.88 (3H, s)                            |
| 3'-OCH <sub>3</sub> | 56.6             | 3.96 (3H, s)                            |

Table S. 5  $^1\text{H}$  (600 MHz) and  $^{13}\text{C}$  (150 MHz) NMR spectroscopic data of compound 5 ( $\text{CD}_3\text{OD}$ ,  $\delta$  in ppm,  $J$  in Hz).

| Position | $\delta_c$ (ppm) | $\delta_H$ ppm (No. of H, $m$ , $J$ Hz) |
|----------|------------------|-----------------------------------------|
| 2        | 165.9            |                                         |
| 3        | 103.4            | 6.61 (1H, s)                            |

|                    |       |                                         |
|--------------------|-------|-----------------------------------------|
| 4                  | 182.4 |                                         |
| 5                  | 153.7 |                                         |
| 6                  | 133.0 |                                         |
| 7                  | 157.6 |                                         |
| 8                  | 95.3  | 6.58 (1H, s)                            |
| 9                  | 153.0 |                                         |
| 10                 | 105.1 |                                         |
| 1'                 | 120.4 |                                         |
| 2', 6'             | 129.5 | 7.86 (2H, <i>d</i> , <i>J</i> = 8.4 Hz) |
| 3', 5'             | 117.0 | 6.94 (2H, <i>d</i> , <i>J</i> = 8.4 Hz) |
| 4'                 | 162.6 |                                         |
| 6-OCH <sub>3</sub> | 60.9  | 3.88 (3H, s)                            |

**Table S. 6** <sup>1</sup>H (600 MHz) and <sup>13</sup>C (150 MHz) NMR spectroscopic data of compound 6 (CD<sub>3</sub>OD,  $\delta$  in ppm, *J* in Hz).

| Position | $\delta_c$ (ppm) | $\delta_H$ ppm (No. of H, <i>m</i> , <i>J</i> Hz) |
|----------|------------------|---------------------------------------------------|
| 2        | 85.3             | 4.95 (1H, <i>d</i> , <i>J</i> = 11.5 Hz)          |
| 3        | 73.8             | 4.54 (1H, <i>d</i> , <i>J</i> = 11.5 Hz)          |
| 4        | 199.0            |                                                   |
| 5        | 165.1            |                                                   |
| 6        | 96.0             | 6.05 (1H, <i>d</i> , <i>J</i> = 2.1 Hz)           |
| 7        | 169.9            |                                                   |
| 8        | 95.0             | 6.09 (1H, <i>d</i> , <i>J</i> = 2.3 Hz)           |
| 9        | 164.4            |                                                   |
| 10       | 102.6            |                                                   |
| 1'       | 129.7            |                                                   |
| 2'       | 115.9            | 6.97 (1H, <i>d</i> , <i>J</i> = 1.9 Hz)           |
| 3'       | 146.3            |                                                   |
| 4'       | 147.2            |                                                   |
| 5'       | 116.1            | 6.80 (1H, <i>d</i> , <i>J</i> = 8.0 Hz)           |

|        |       |                                               |
|--------|-------|-----------------------------------------------|
| 6`     | 120.9 | 6.85 (1H, <i>dd</i> , <i>J</i> = 8.1, 2.1 Hz) |
| 7-OCH3 | 56.4  | 3.82 (3H, <i>s</i> )                          |

Table S. 7. <sup>1</sup>H (300 MHz) and <sup>13</sup>C (75 MHz) NMR spectroscopic data of compound 7 (DMSO-*d*6 δ in ppm, *J* in Hz).

| Position | δ <sub>c</sub> (ppm) | δ <sub>H</sub> ppm (No. of H, <i>m</i> , <i>J</i> Hz) |                                                 |
|----------|----------------------|-------------------------------------------------------|-------------------------------------------------|
| 2        | 78.7                 | 5.45 (1H, <i>dd</i> , <i>J</i> = 12.3, 3.1 Hz)        |                                                 |
| 3        | 42.2                 | 3a                                                    | 3.21 (1H, <i>dd</i> , <i>J</i> = 12.6, 17.1 Hz) |
|          |                      | 3b                                                    | 2.75 (1H, <i>dd</i> , <i>J</i> = 16.8, 3.1 Hz)  |
| 4        | 197.0                |                                                       |                                                 |
| 5        | 163.2                |                                                       |                                                 |
| 6        | 94.6                 | 6.07(1H, <i>d</i> , <i>J</i> = 2.4)                   |                                                 |
| 7        | 167.4                |                                                       |                                                 |
| 8        | 93.8                 | 6.09 (1H, <i>d</i> , <i>J</i> = 2.4)                  |                                                 |
| 9        | 162.9                |                                                       |                                                 |
| 10       | 102.6                |                                                       |                                                 |
| 1`       | 129.3                |                                                       |                                                 |
| 2`       | 114.4                | 6.89 (1H, <i>s</i> )                                  |                                                 |
| 3`       | 145.2                |                                                       |                                                 |
| 4`       | 145.8                |                                                       |                                                 |
| 5`       | 115.3                | 6.75 (2H, <i>s</i> )                                  |                                                 |
| 6`       | 118.0                | 6.75 (2H, <i>s</i> )                                  |                                                 |
| 7-OCH3   | 55.9                 | 3.79 (3H, <i>s</i> )                                  |                                                 |
| 5-OH     |                      | 12.10 (1H, <i>s</i> )                                 |                                                 |
| 3`-OH    |                      | 9.02 (1H, <i>s</i> )                                  |                                                 |
| 4`-OH    |                      | 9.02 (1H, <i>s</i> )                                  |                                                 |

Table S. 8 <sup>1</sup>H (300 MHz) and <sup>13</sup>C (75 MHz) NMR spectroscopic data of compound 8 (DMSO-*d*6 δ in ppm, *J* in Hz).

| Position | δ <sub>c</sub> (ppm) | δ <sub>H</sub> ppm (No. of H, <i>m</i> , <i>J</i> Hz) |
|----------|----------------------|-------------------------------------------------------|
| 2        | 163.3                |                                                       |
| 3        | 103.4                | 6.95 (1H, <i>s</i> )                                  |

|                     |       |                                             |
|---------------------|-------|---------------------------------------------|
| 4                   | 182.2 |                                             |
| 5                   | 152.5 |                                             |
| 6                   | 131.4 |                                             |
| 7                   | 157.7 |                                             |
| 8                   | 94.5  | 6.63 (1H, <i>s</i> )                        |
| 9                   | 152.8 |                                             |
| 10                  | 104.0 |                                             |
| 1`                  | 123.0 |                                             |
| 2`                  | 109.4 | 7.56 (1H, <i>d</i> , <i>J</i> = 2.1)        |
| 3`                  | 149.0 |                                             |
| 4`                  | 152.1 |                                             |
| 5`                  | 111.7 | 7.13 (1H, <i>d</i> , <i>J</i> = 8.4)        |
| 6`                  | 120.0 | 7.68 (1H, <i>dd</i> , <i>J</i> = 8.3, 2 Hz) |
| 6-OCH <sub>3</sub>  | 60.0  | 3.76 (3H, <i>s</i> )                        |
| 7-OCH <sub>3</sub>  | 55.8  | 3.88 (3H, <i>s</i> )                        |
| 4`-OCH <sub>3</sub> | 55.9  | 3.86 (3H, <i>s</i> )                        |
| 5-OH                |       | 13.03 (1H, <i>s</i> )                       |
